# Supplementary material for: Effects of hydrocarbon substituents on highly fluorescent bis(4-phenylphenyl)pyridylmethyl radical derivatives
Source: Royal Society of Chemistry journal article supplement (doi:10.1039/d3ma00469d), 2023-01-01

## Supplementary Information

# Effects of hydrocarbon substituents on highly fluorescent bis(4-phenylphenyl)pyridylmethyl radical derivatives

Yohei Hattori <sup>a,\*</sup>, Ryota Kitajima <sup>a</sup>, Ryota Matsuoka <sup>b,c</sup>, Tetsuro Kusamoto <sup>b,c,d,e</sup> and Kingo Uchida <sup>a</sup>

<sup>a</sup> Materials Chemistry Course, Faculty of Advanced Science and Technology, Ryukoku University, Seta, Otsu, Shiga 520-2194, Japan

<sup>b</sup> Department of Life and Coordination-Complex Molecular Science, Institute for Molecular Science, 5-1, Higashiyama, Myodaiji, Okazaki, Aichi 444-8787, Japan

<sup>c</sup> SOKENDAI (The Graduate University for Advanced Studies), Shonan Village, Hayama, Kanagawa 240-0193, Japan

<sup>d</sup> Graduate School of Engineering Science, Osaka University, 1-3, Machikaneyama, Toyonaka, Osaka, 560-8531, Japan

<sup>e</sup> JST-PRESTO, 4-1-8, Honcho, Kawaguchi, Saitama 332-0012, Japan

### Contents

|                                                                                                            |     |
|------------------------------------------------------------------------------------------------------------|-----|
| Table S1. Torsion angles in the D <sub>0</sub> and D <sub>1</sub> state optimized using UB3LYP/6-31G(d, p) | S2  |
| Table S2. PLQYs and photophysical parameters in chloroform                                                 | S2  |
| Table S3. Stability in dichloromethane under 370 nm UV irradiation                                         | S3  |
| Table S3. Stability in chloroform under 370 nm UV irradiation                                              | S3  |
| Figure S1. ESR spectra                                                                                     | S4  |
| Figure S2. Stability of <b>1-6</b> in solution under 370 nm UV irradiation.                                | S4  |
| Cartesian coordinates of all the optimized geometries by DFT calculation                                   | S5  |
| Results of TD-DFT calculations                                                                             | S24 |
| NMR spectra                                                                                                | S30 |

**Table S1.** Calculated torsion angles of the aryl rings of radicals in dichloromethane. Angles outside of brackets are in the D<sub>0</sub> state optimized using UB3LYP/6-31G(d, p). Angles inside brackets are in the D<sub>1</sub> state optimized using TD-UB3LYP/6-31G(d, p).

|             | MesPyBTM  | TippPyBTM<br>(1) | Mes <sub>2</sub> PyBTM | Tipp <sub>2</sub> PyBTM<br>(2) | TippF <sub>2</sub> PyBTM<br>(3) | Mes <sub>2</sub> F <sub>2</sub> PyBTM | Tipp <sub>2</sub> F <sub>2</sub> PyBTM<br>(4) |
|-------------|-----------|------------------|------------------------|--------------------------------|---------------------------------|---------------------------------------|-----------------------------------------------|
| $\varphi_1$ | 48° [37°] | 48° [36°]        | 48° [37°]              | 48° [37°]                      | 32° [23°]                       | 32° [24°]                             | 32° [23°]                                     |
| $\varphi_2$ | 49° [52°] | 49° [52°]        | 49° [51°]              | 49° [52°]                      | 52° [54°]                       | 52° [53°]                             | 52° [53°]                                     |
| $\varphi_3$ | 49° [47°] | 49° [47°]        | 49° [48°]              | 49° [48°]                      | 52° [48°]                       | 52° [49°]                             | 52° [49°]                                     |
| $\phi_4$    | 83° [51°] | 90° [55°]        | 84° [50°]              | 88° [55°]                      | 89° [54°]                       | 87° [49°]                             | 89° [54°]                                     |
| $\phi_5$    | -         | -                | 84° [81°]              | 88° [87°]                      | -                               | 87° [83°]                             | 89° [89°]                                     |

  

|             | PyBTM     | F <sub>2</sub> PyBTM | PyPBTM    | Ph*F <sub>2</sub> PyBTM (5) | Ph* <sub>2</sub> F <sub>2</sub> PyBTM (6) | Xyl <sub>2</sub> F <sub>2</sub> PyBTM (7) | Biph <sub>2</sub> F <sub>2</sub> PyBTM (8) |
|-------------|-----------|----------------------|-----------|-----------------------------|-------------------------------------------|-------------------------------------------|--------------------------------------------|
| $\varphi_1$ | 48° [35°] | 32° [19°]            | 48° [43°] | 32° [25°]                   | 32° [24°]                                 | 32° [27°]                                 | 32° [25°]                                  |
| $\varphi_2$ | 49° [51°] | 53° [52°]            | 48° [45°] | 52° [50°]                   | 52° [52°]                                 | 52° [52°]                                 | 52° [50°]                                  |
| $\varphi_3$ | 49° [47°] | 53° [52°]            | 48° [45°] | 53° [51°]                   | 52° [49°]                                 | 52° [46°]                                 | 52° [48°]                                  |
| $\phi_4$    | -         | -                    | 34° [25°] | 88° [89°]                   | 88° [88°]                                 | 48° [34°]                                 | 48° [39°]                                  |
| $\phi_5$    | -         | -                    | 34° [25°] | -                           | 88° [89°]                                 | 51° [50°]                                 | 50° [49°]                                  |
| $\phi_6$    |           |                      |           |                             |                                           |                                           | 52° [39°]                                  |
| $\phi_7$    |           |                      |           |                             |                                           |                                           | 52° [51°]                                  |

$\varphi_1$ : Torsion angle of pyridyl ring.  $\varphi_2$  and  $\varphi_3$ : Torsion angles of dichlorophenyl rings.  $\phi_4$  and  $\phi_5$ : Dihedral angles between dichlorophenyl groups and (alkyl)phenyl groups.  $\phi_6$  and  $\phi_7$ : Dihedral angles between *o*-phenylene groups and phenyl groups.

**Table S2.** PLQYs and photophysical parameters of radicals in chloroform.

|                                            | $\Phi_f$ / % | $\tau$ / ns | $k_f / 10^7 \text{ s}^{-1}$ | $k_{nr} / 10^7 \text{ s}^{-1}$ |
|--------------------------------------------|--------------|-------------|-----------------------------|--------------------------------|
| MesPyBTM                                   | 28           | 26          | 1.1                         | 2.8                            |
| TippPyBTM (1)                              | 22           | 24          | 0.9                         | 3.3                            |
| Mes <sub>2</sub> PyBTM                     | 45           | 39          | 1.2                         | 1.4                            |
| Tipp <sub>2</sub> PyBTM (2)                | 42           | 41          | 1.0                         | 1.4                            |
| TippF <sub>2</sub> PyBTM (3)               | 53           | 43          | 1.2                         | 1.1                            |
| Mes <sub>2</sub> F <sub>2</sub> PyBTM      | 69           | 49          | 1.4                         | 0.6                            |
| Tipp <sub>2</sub> F <sub>2</sub> PyBTM (4) | 63           | 53          | 1.2                         | 0.7                            |
| PyBTM                                      | 3            | 7.6         | 0.4                         | 12.8                           |
| F <sub>2</sub> PyBTM                       | 6            | 18.1        | 0.3                         | 5.2                            |
| PyPBTM                                     | 8.6          | 12          | 0.7                         | 7.6                            |
| Ph*F <sub>2</sub> PyBTM (5)                | 30           | 20          | 1.5                         | 3.5                            |
| Ph* <sub>2</sub> F <sub>2</sub> PyBTM (6)  | 47           | 32          | 1.5                         | 1.7                            |
| Xyl <sub>2</sub> F <sub>2</sub> PyBTM (7)  | 36           | 26          | 1.4                         | 2.5                            |
| Biph <sub>2</sub> F <sub>2</sub> PyBTM (8) | 13           | 14          | 0.9                         | 6.2                            |

**Table S3.** Stability of **1**, **2**, **3**, **4**, **7**, and **8** in dichloromethane under 370 nm UV irradiation.

| Exp. no. | $t_{1/2}$ [s]<br>PyBT | $t_{1/2}$ [s]<br>Mes<br>PyBTM | $t_{1/2}$ [s]<br>Mes <sub>2</sub><br>PyBTM | $t_{1/2}$ [s]<br>Mes <sub>2</sub><br>F <sub>2</sub> PyBTM | $t_{1/2}$ [s]<br><b>1</b> | $t_{1/2}$ [s]<br><b>2</b> | $t_{1/2}$ [s]<br><b>3</b> | $t_{1/2}$ [s]<br><b>4</b> | $t_{1/2}$ [s]<br><b>7</b> | $t_{1/2}$ [s]<br><b>8</b> |
|----------|-----------------------|-------------------------------|--------------------------------------------|-----------------------------------------------------------|---------------------------|---------------------------|---------------------------|---------------------------|---------------------------|---------------------------|
| 1        | 382                   | 240                           | 274                                        | 452                                                       | 216                       | 152                       | 156                       | 132                       | $5.75 \times 10^3$        | $3.12 \times 10^4$        |
| 2        | 312                   | 246                           | 276                                        | 424                                                       | 192                       | 152                       | 174                       | 160                       | $5.51 \times 10^3$        | $3.09 \times 10^4$        |
| 3        | 368                   | 260                           | 290                                        | 414                                                       | 210                       | 156                       | 144                       | 142                       | $5.64 \times 10^3$        | $4.44 \times 10^4$        |
| 4        | 360                   |                               |                                            |                                                           |                           |                           |                           |                           |                           |                           |
| 5        | 254                   |                               |                                            |                                                           |                           |                           |                           |                           |                           |                           |
| 6        | 276                   |                               |                                            |                                                           |                           |                           |                           |                           |                           |                           |
| 7        | 270                   |                               |                                            |                                                           |                           |                           |                           |                           |                           |                           |
| Ave.     | 317                   | 249                           | 280                                        | 430                                                       | 206                       | 153                       | 158                       | 145                       | $5.63 \times 10^3$        | $3.55 \times 10^4$        |
| $\sigma$ | 53                    | 10                            | 9                                          | 20                                                        | 12                        | 2                         | 15                        | 14                        | $0.12 \times 10^3$        | $0.77 \times 10^4$        |

**Table S4.** Stability of **5**, and **6** in chloroform under 370 nm UV irradiation.

| Exp. no. | $t_{1/2}$ [s]<br>PyBTM | $t_{1/2}$ [s]<br><b>5</b> | $t_{1/2}$ [s]<br><b>6</b> |
|----------|------------------------|---------------------------|---------------------------|
| 1        | 176                    | $1.45 \times 10^3$        | $1.27 \times 10^3$        |
| 2        | 184                    | $1.49 \times 10^3$        | $1.11 \times 10^3$        |
| 3        | 162                    | $1.55 \times 10^3$        | $1.01 \times 10^3$        |
| 4        | 162                    |                           |                           |
| 5        | 188                    |                           |                           |
| 6        | 176                    |                           |                           |
| 7        | 154                    |                           |                           |
| Ave.     | 172                    | $1.50 \times 10^3$        | $1.13 \times 10^3$        |
| $\sigma$ | 13                     | $0.05 \times 10^3$        | $0.13 \times 10^3$        |

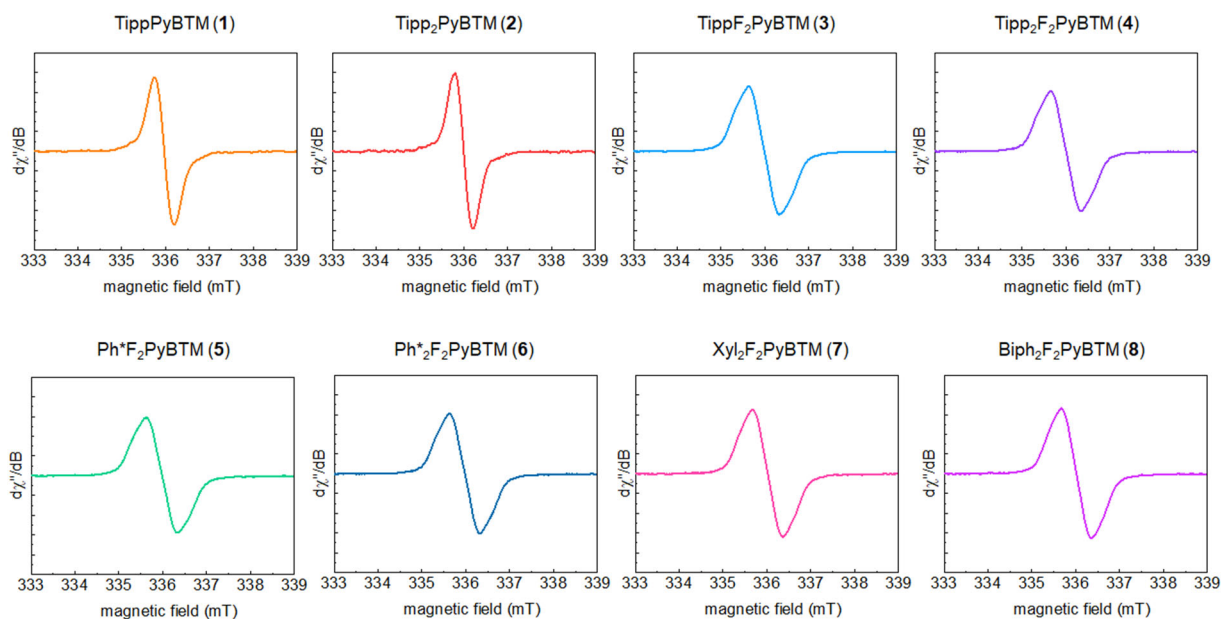

**Figure S1.** ESR spectra of the radicals **1-8** in dichloromethane. The  $g$  factors of the radicals were *ca.*  $g = 2.0032 \pm 0.0002$ .

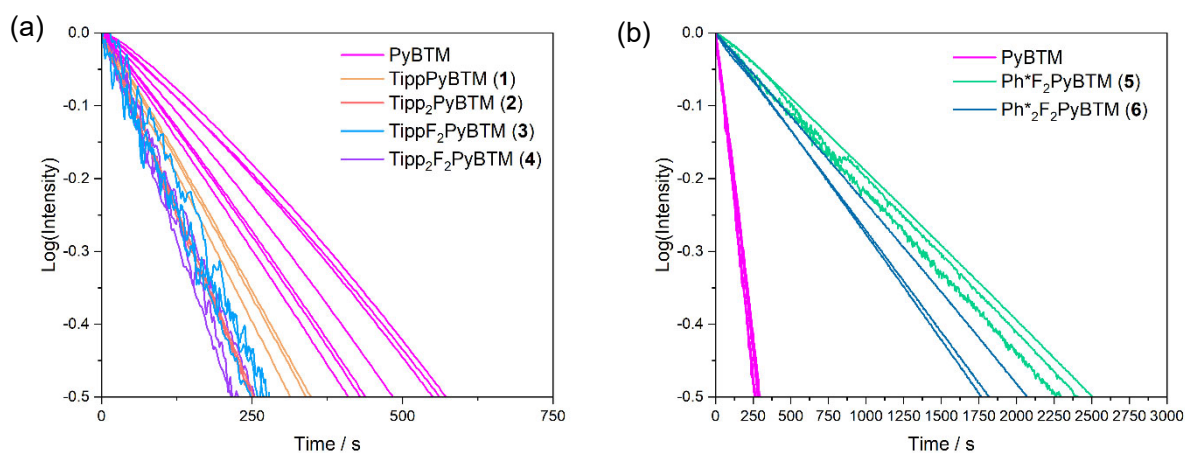

**Figure S2.** Plots showing the emission decay of (a) **1, 2, 3, and 4** in dichloromethane under continuous excitation with light at  $\lambda_{\text{ex}} = 370 \text{ nm} \pm 10 \text{ nm}$ , and (b) **5, and 6** in chloroform under continuous excitation with light at  $\lambda_{\text{ex}} = 370 \text{ nm} \pm 10 \text{ nm}$ . The emission was monitored at the peak emission.

# Cartesian coordinates of the optimized geometries by DFT calculation in dichloromethane

TippPyBTM (D<sub>0</sub> state, UB3LYP/6-31G(d, p))

Standard orientation:

| Center<br>Number | Atomic<br>Number | Atomic<br>Type | Coordinates (Angstroms) |           |           |
|------------------|------------------|----------------|-------------------------|-----------|-----------|
|                  |                  |                | X                       | Y         | Z         |
| 1                | 17               | 0              | -0.588614               | -1.432750 | 2.597282  |
| 2                | 17               | 0              | -1.622899               | 2.242209  | 1.626315  |
| 3                | 17               | 0              | -0.919721               | 0.788786  | -2.465047 |
| 4                | 17               | 0              | -4.485799               | -0.798015 | -2.006102 |
| 5                | 7                | 0              | -4.057741               | -4.219549 | 1.162406  |
| 6                | 6                | 0              | 1.480791                | -0.670334 | 1.079115  |
| 7                | 1                | 0              | 2.062141                | -1.025635 | 1.921725  |
| 8                | 6                | 0              | -0.053364               | 0.258789  | -1.027972 |
| 9                | 6                | 0              | -4.145015               | 0.670351  | -1.106545 |
| 10               | 6                | 0              | -3.075228               | -4.152870 | 0.261121  |
| 11               | 1                | 0              | -2.762153               | -5.082065 | -0.206125 |
| 12               | 6                | 0              | -2.839975               | -1.722170 | 0.470552  |
| 13               | 6                | 0              | -4.953146               | 1.761280  | -1.407021 |
| 14               | 6                | 0              | -4.689732               | 2.979713  | -0.790029 |
| 15               | 6                | 0              | 0.095802                | -0.776939 | 1.114561  |
| 16               | 6                | 0              | -2.458679               | -2.958428 | -0.105952 |
| 17               | 6                | 0              | -2.853624               | 2.003968  | 0.397843  |
| 18               | 6                | 0              | -3.641579               | 3.114320  | 0.114299  |
| 19               | 6                | 0              | 1.330757                | 0.375215  | -1.076074 |
| 20               | 6                | 0              | -3.060236               | 0.731171  | -0.194161 |
| 21               | 6                | 0              | -0.744759               | -0.320621 | 0.066863  |
| 22               | 6                | 0              | -3.881973               | -1.841184 | 1.422372  |
| 23               | 6                | 0              | -4.450190               | -3.076057 | 1.728492  |
| 24               | 6                | 0              | -2.213056               | -0.436189 | 0.113666  |
| 25               | 1                | 0              | -5.243340               | -3.131484 | 2.468484  |
| 26               | 6                | 0              | 2.123113                | -0.089231 | -0.020176 |
| 27               | 1                | 0              | -5.757930               | 1.662712  | -2.123820 |
| 28               | 6                | 0              | 3.617888                | 0.032925  | -0.064539 |
| 29               | 6                | 0              | 4.245369                | 1.191938  | 0.450251  |
| 30               | 6                | 0              | 4.393587                | -1.009360 | -0.618828 |
| 31               | 6                | 0              | 5.640304                | 1.281163  | 0.397858  |
| 32               | 6                | 0              | 5.786838                | -0.867350 | -0.645647 |
| 33               | 6                | 0              | 6.432642                | 0.264563  | -0.145241 |
| 34               | 1                | 0              | 6.120703                | 2.171799  | 0.793749  |
| 35               | 1                | 0              | 6.389929                | -1.665789 | -1.070836 |
| 36               | 1                | 0              | 1.795722                | 0.815038  | -1.950476 |
| 37               | 1                | 0              | -3.450224               | 4.058422  | 0.607510  |
| 38               | 6                | 0              | 3.766641                | -2.281536 | -1.187795 |
| 39               | 1                | 0              | 2.681386                | -2.203000 | -1.077035 |
| 40               | 6                | 0              | 3.450652                | 2.346246  | 1.060513  |
| 41               | 1                | 0              | 2.388699                | 2.089285  | 1.012040  |
| 42               | 6                | 0              | 7.950969                | 0.379147  | -0.194109 |
| 43               | 1                | 0              | 8.326177                | -0.540376 | -0.661488 |
| 44               | 6                | 0              | 4.210471                | -3.533417 | -0.407060 |
| 45               | 1                | 0              | 5.290369                | -3.696478 | -0.489426 |
| 46               | 1                | 0              | 3.965693                | -3.445001 | 0.656194  |
| 47               | 1                | 0              | 3.708446                | -4.424841 | -0.798182 |
| 48               | 6                | 0              | 4.056618                | -2.435918 | -2.693080 |
| 49               | 1                | 0              | 3.704566                | -1.565656 | -3.256079 |
| 50               | 1                | 0              | 5.128731                | -2.548354 | -2.886648 |
| 51               | 1                | 0              | 3.552224                | -3.323678 | -3.089487 |
| 52               | 6                | 0              | 3.796964                | 2.553361  | 2.547380  |
| 53               | 1                | 0              | 3.624619                | 1.639950  | 3.125509  |
| 54               | 1                | 0              | 4.845632                | 2.840159  | 2.679906  |
| 55               | 1                | 0              | 3.177884                | 3.348705  | 2.976155  |
| 56               | 6                | 0              | 3.635528                | 3.650362  | 0.261313  |
| 57               | 1                | 0              | 4.676440                | 3.990403  | 0.281776  |
| 58               | 1                | 0              | 3.347922                | 3.517199  | -0.786450 |
| 59               | 1                | 0              | 3.016356                | 4.448488  | 0.684741  |
| 60               | 6                | 0              | 8.565356                | 0.464323  | 1.215668  |
| 61               | 1                | 0              | 9.658944                | 0.484642  | 1.157768  |
| 62               | 1                | 0              | 8.243106                | 1.372856  | 1.736069  |
| 63               | 1                | 0              | 8.272714                | -0.394261 | 1.828205  |
| 64               | 6                | 0              | 8.408728                | 1.561516  | -1.068570 |
| 65               | 1                | 0              | 8.004996                | 1.484041  | -2.082968 |

|    |    |   |           |           |           |
|----|----|---|-----------|-----------|-----------|
| 66 | 1  | 0 | 8.079016  | 2.518087  | -0.648649 |
| 67 | 1  | 0 | 9.501519  | 1.587940  | -1.137899 |
| 68 | 17 | 0 | -1.257195 | -3.060713 | -1.378006 |
| 69 | 17 | 0 | -4.462726 | -0.466392 | 2.341938  |
| 70 | 17 | 0 | -5.693450 | 4.365773  | -1.157291 |

Tipp<sub>2</sub>PyBTM (D<sub>0</sub> state, UB3LYP/6-31G(d, p))

Standard orientation:

| Center<br>Number | Atomic<br>Number | Atomic<br>Type | Coordinates (Angstroms) |           |           |
|------------------|------------------|----------------|-------------------------|-----------|-----------|
|                  |                  |                | X                       | Y         | Z         |
| 1                | 17               | 0              | 2.114225                | 2.674986  | -2.174737 |
| 2                | 17               | 0              | -0.427116               | -0.329877 | -2.160154 |
| 3                | 17               | 0              | 0.427117                | -0.329877 | 2.160155  |
| 4                | 17               | 0              | -2.114223               | 2.674984  | 2.174739  |
| 5                | 7                | 0              | -0.000003               | 6.239971  | -0.000001 |
| 6                | 6                | 0              | 3.533507                | 0.771648  | -0.936455 |
| 7                | 1                | 0              | 4.284874                | 1.036535  | -1.670990 |
| 8                | 6                | 0              | 1.564315                | 0.108431  | 0.890419  |
| 9                | 6                | 0              | -2.325933               | 1.459191  | 0.919538  |
| 10               | 6                | 0              | 0.774513                | 5.545759  | 0.836959  |
| 11               | 1                | 0              | 1.398016                | 6.110073  | 1.524423  |
| 12               | 6                | 0              | -0.000001               | 3.375530  | -0.000001 |
| 13               | 6                | 0              | -3.533506               | 0.771646  | 0.936456  |
| 14               | 6                | 0              | -3.773545               | -0.269028 | 0.032133  |
| 15               | 6                | 0              | 2.325934                | 1.459193  | -0.919537 |
| 16               | 6                | 0              | 0.801392                | 4.153142  | 0.871351  |
| 17               | 6                | 0              | -1.564314               | 0.108430  | -0.890419 |
| 18               | 6                | 0              | -2.765860               | -0.590281 | -0.884247 |
| 19               | 6                | 0              | 2.765861                | -0.590280 | 0.884247  |
| 20               | 6                | 0              | -1.278597               | 1.167348  | 0.008890  |
| 21               | 6                | 0              | 1.278598                | 1.167349  | -0.008889 |
| 22               | 6                | 0              | -0.801395               | 4.153140  | -0.871352 |
| 23               | 6                | 0              | -0.774518               | 5.545757  | -0.836961 |
| 24               | 6                | 0              | 0.000000                | 1.901144  | 0.000000  |
| 25               | 1                | 0              | -1.398023               | 6.110070  | -1.524425 |
| 26               | 6                | 0              | 3.773546                | -0.269027 | -0.032133 |
| 27               | 1                | 0              | -4.284872               | 1.036532  | 1.670991  |
| 28               | 6                | 0              | -5.073207               | -1.018689 | 0.045825  |
| 29               | 6                | 0              | -5.201434               | -2.192147 | 0.826009  |
| 30               | 6                | 0              | -6.164843               | -0.550227 | -0.718592 |
| 31               | 6                | 0              | -6.423904               | -2.871883 | 0.823053  |
| 32               | 6                | 0              | -7.366301               | -1.269494 | -0.683751 |
| 33               | 6                | 0              | -7.521047               | -2.429957 | 0.076565  |
| 34               | 1                | 0              | -6.520628               | -3.772783 | 1.422874  |
| 35               | 1                | 0              | -8.210511               | -0.914005 | -1.269408 |
| 36               | 6                | 0              | 5.073208                | -1.018688 | -0.045825 |
| 37               | 6                | 0              | 5.201435                | -2.192145 | -0.826012 |
| 38               | 6                | 0              | 6.164844                | -0.550228 | 0.718594  |
| 39               | 6                | 0              | 6.423905                | -2.871881 | -0.823055 |
| 40               | 6                | 0              | 7.366301                | -1.269495 | 0.683753  |
| 41               | 6                | 0              | 7.521047                | -2.429957 | -0.076564 |
| 42               | 1                | 0              | 6.520629                | -3.772780 | -1.422877 |
| 43               | 1                | 0              | 8.210510                | -0.914007 | 1.269412  |
| 44               | 1                | 0              | 2.924444                | -1.378897 | 1.610347  |
| 45               | 1                | 0              | -2.924442               | -1.378898 | -1.610347 |
| 46               | 6                | 0              | 6.079681                | 0.709906  | 1.578850  |
| 47               | 1                | 0              | 5.067577                | 1.114259  | 1.487647  |
| 48               | 6                | 0              | 4.051451                | -2.738177 | -1.672079 |
| 49               | 1                | 0              | 3.192244                | -2.073571 | -1.545233 |
| 50               | 6                | 0              | 8.845300                | -3.183100 | -0.086223 |
| 51               | 1                | 0              | 9.529794                | -2.635326 | 0.574229  |
| 52               | 6                | 0              | -6.079681               | 0.709908  | -1.578846 |
| 53               | 1                | 0              | -5.067577               | 1.114260  | -1.487644 |
| 54               | 6                | 0              | -4.051449               | -2.738182 | 1.672075  |
| 55               | 1                | 0              | -3.192241               | -2.073577 | 1.545227  |
| 56               | 6                | 0              | -8.845301               | -3.183099 | 0.086224  |
| 57               | 1                | 0              | -9.529795               | -2.635323 | -0.574225 |
| 58               | 6                | 0              | 7.048608                | 1.801286  | 1.084980  |
| 59               | 1                | 0              | 8.091881                | 1.477523  | 1.164864  |
| 60               | 1                | 0              | 6.857117                | 2.057137  | 0.038014  |

|     |    |   |            |           |           |
|-----|----|---|------------|-----------|-----------|
| 61  | 1  | 0 | 6.935427   | 2.711732  | 1.683281  |
| 62  | 6  | 0 | 6.308720   | 0.399850  | 3.070507  |
| 63  | 1  | 0 | 5.595170   | -0.346198 | 3.434530  |
| 64  | 1  | 0 | 7.317725   | 0.014242  | 3.251392  |
| 65  | 1  | 0 | 6.187273   | 1.307532  | 3.671360  |
| 66  | 6  | 0 | 4.400363   | -2.742225 | -3.172718 |
| 67  | 1  | 0 | 4.670600   | -1.739730 | -3.519440 |
| 68  | 1  | 0 | 5.242178   | -3.408910 | -3.388192 |
| 69  | 1  | 0 | 3.544021   | -3.086277 | -3.762633 |
| 70  | 6  | 0 | 3.612535   | -4.137901 | -1.201325 |
| 71  | 1  | 0 | 4.416590   | -4.872139 | -1.319628 |
| 72  | 1  | 0 | 3.321437   | -4.128044 | -0.146122 |
| 73  | 1  | 0 | 2.754973   | -4.486136 | -1.786981 |
| 74  | 6  | 0 | 9.479560   | -3.209158 | -1.489537 |
| 75  | 1  | 0 | 10.457005  | -3.702611 | -1.460708 |
| 76  | 1  | 0 | 8.851088   | -3.757394 | -2.199850 |
| 77  | 1  | 0 | 9.620841   | -2.196317 | -1.879652 |
| 78  | 6  | 0 | 8.698774   | -4.607929 | 0.479960  |
| 79  | 1  | 0 | 8.283122   | -4.591564 | 1.492374  |
| 80  | 1  | 0 | 8.036901   | -5.218002 | -0.144414 |
| 81  | 1  | 0 | 9.672495   | -5.107950 | 0.519453  |
| 82  | 6  | 0 | -9.479558  | -3.209162 | 1.489539  |
| 83  | 1  | 0 | -9.620837  | -2.196323 | 1.879659  |
| 84  | 1  | 0 | -10.457003 | -3.702615 | 1.460710  |
| 85  | 1  | 0 | -8.851084  | -3.757401 | 2.199849  |
| 86  | 6  | 0 | -8.698776  | -4.607926 | -0.479965 |
| 87  | 1  | 0 | -8.283126  | -4.591558 | -1.492379 |
| 88  | 1  | 0 | -8.036901  | -5.218002 | 0.144405  |
| 89  | 1  | 0 | -9.672497  | -5.107947 | -0.519458 |
| 90  | 6  | 0 | -3.612537  | -4.137907 | 1.201322  |
| 91  | 1  | 0 | -4.416593  | -4.872144 | 1.319628  |
| 92  | 1  | 0 | -3.321442  | -4.128052 | 0.146118  |
| 93  | 1  | 0 | -2.754975  | -4.486143 | 1.786976  |
| 94  | 6  | 0 | -4.400358  | -2.742226 | 3.172714  |
| 95  | 1  | 0 | -4.670592  | -1.739730 | 3.519436  |
| 96  | 1  | 0 | -5.242175  | -3.408909 | 3.388190  |
| 97  | 1  | 0 | -3.544016  | -3.086281 | 3.762628  |
| 98  | 6  | 0 | -7.048607  | 1.801288  | -1.084973 |
| 99  | 1  | 0 | -8.091880  | 1.477525  | -1.164855 |
| 100 | 1  | 0 | -6.857114  | 2.057137  | -0.038007 |
| 101 | 1  | 0 | -6.935426  | 2.711734  | -1.683272 |
| 102 | 6  | 0 | -6.308724  | 0.399854  | -3.070504 |
| 103 | 1  | 0 | -5.595175  | -0.346194 | -3.434528 |
| 104 | 1  | 0 | -7.317729  | 0.014249  | -3.251387 |
| 105 | 1  | 0 | -6.187277  | 1.307538  | -3.671355 |
| 106 | 17 | 0 | 1.807279   | 3.424232  | 2.108505  |
| 107 | 17 | 0 | -1.807281  | 3.424228  | -2.108507 |

TippF<sub>2</sub>PyBTM (D<sub>0</sub> state, UB3LYP/6-31G(d, p))

Standard orientation:

| Center<br>Number | Atomic<br>Number | Atomic<br>Type | Coordinates (Angstroms) |           |           |
|------------------|------------------|----------------|-------------------------|-----------|-----------|
|                  |                  |                | X                       | Y         | Z         |
| 1                | 17               | 0              | 0.673014                | 1.518112  | 2.614643  |
| 2                | 17               | 0              | 1.878548                | -1.979457 | 1.914499  |
| 3                | 17               | 0              | 1.101225                | -0.707149 | -2.431107 |
| 4                | 17               | 0              | 4.540093                | 0.797080  | -2.057651 |
| 5                | 7                | 0              | 4.058788                | 4.427135  | 0.978151  |
| 6                | 6                | 0              | -1.371406               | 0.705893  | 1.082403  |
| 7                | 1                | 0              | -1.968374               | 1.049388  | 1.918982  |
| 8                | 6                | 0              | 0.201206                | -0.186168 | -1.011071 |
| 9                | 6                | 0              | 4.269815                | -0.599338 | -1.027053 |
| 10               | 6                | 0              | 2.901245                | 4.309899  | 0.315561  |
| 11               | 1                | 0              | 2.404520                | 5.216843  | -0.017422 |
| 12               | 6                | 0              | 2.916629                | 1.858827  | 0.425673  |
| 13               | 6                | 0              | 5.103297                | -1.688523 | -1.253920 |
| 14               | 6                | 0              | 4.900314                | -2.851426 | -0.517178 |
| 15               | 6                | 0              | 0.010451                | 0.839228  | 1.130907  |
| 16               | 6                | 0              | 2.323664                | 3.080128  | 0.036232  |
| 17               | 6                | 0              | 3.072337                | -1.823304 | 0.636847  |
| 18               | 6                | 0              | 3.888083                | -2.932575 | 0.431990  |

|    |    |   |           |           |           |
|----|----|---|-----------|-----------|-----------|
| 19 | 6  | 0 | -1.181224 | -0.327562 | -1.076048 |
| 20 | 6  | 0 | 3.215593  | -0.610370 | -0.078910 |
| 21 | 6  | 0 | 0.867374  | 0.401111  | 0.090501  |
| 22 | 6  | 0 | 4.134556  | 2.042770  | 1.116395  |
| 23 | 6  | 0 | 4.663039  | 3.299247  | 1.372534  |
| 24 | 6  | 0 | 2.336169  | 0.556476  | 0.147443  |
| 25 | 1  | 0 | 5.599127  | 3.380027  | 1.917846  |
| 26 | 6  | 0 | -1.991565 | 0.119631  | -0.027610 |
| 27 | 1  | 0 | 5.882999  | -1.632884 | -2.002372 |
| 28 | 6  | 0 | -3.484190 | -0.018672 | -0.092753 |
| 29 | 6  | 0 | -4.106613 | -1.193062 | 0.392024  |
| 30 | 6  | 0 | -4.262884 | 1.025985  | -0.638488 |
| 31 | 6  | 0 | -5.499659 | -1.295875 | 0.317624  |
| 32 | 6  | 0 | -5.654022 | 0.870232  | -0.688023 |
| 33 | 6  | 0 | -6.294802 | -0.277617 | -0.218279 |
| 34 | 1  | 0 | -5.976346 | -2.198549 | 0.690109  |
| 35 | 1  | 0 | -6.259498 | 1.670083  | -1.107150 |
| 36 | 1  | 0 | -1.628461 | -0.772772 | -1.956958 |
| 37 | 1  | 0 | 3.742955  | -3.831605 | 1.016678  |
| 38 | 6  | 0 | -3.640887 | 2.314440  | -1.175828 |
| 39 | 1  | 0 | -2.556758 | 2.246216  | -1.048514 |
| 40 | 6  | 0 | -3.308038 | -2.349174 | 0.993675  |
| 41 | 1  | 0 | -2.249002 | -2.077062 | 0.970350  |
| 42 | 6  | 0 | -7.810968 | -0.407054 | -0.291644 |
| 43 | 1  | 0 | -8.189106 | 0.516863  | -0.747876 |
| 44 | 9  | 0 | 4.804693  | 0.968343  | 1.570382  |
| 45 | 9  | 0 | 1.169728  | 3.064858  | -0.654571 |
| 46 | 6  | 0 | -4.111666 | 3.548308  | -0.382323 |
| 47 | 1  | 0 | -5.191778 | 3.701117  | -0.480128 |
| 48 | 1  | 0 | -3.883635 | 3.445059  | 0.683331  |
| 49 | 1  | 0 | -3.613178 | 4.451489  | -0.750375 |
| 50 | 6  | 0 | -3.908110 | 2.490448  | -2.682962 |
| 51 | 1  | 0 | -3.536859 | 1.633626  | -3.254173 |
| 52 | 1  | 0 | -4.978204 | 2.593885  | -2.892168 |
| 53 | 1  | 0 | -3.407559 | 3.390227  | -3.056495 |
| 54 | 6  | 0 | -3.678717 | -2.591472 | 2.469299  |
| 55 | 1  | 0 | -3.530088 | -1.687758 | 3.068859  |
| 56 | 1  | 0 | -4.725365 | -2.895621 | 2.576715  |
| 57 | 1  | 0 | -3.056200 | -3.386671 | 2.893348  |
| 58 | 6  | 0 | -3.460762 | -3.638881 | 0.164819  |
| 59 | 1  | 0 | -4.497592 | -3.991741 | 0.157968  |
| 60 | 1  | 0 | -3.154686 | -3.480888 | -0.874233 |
| 61 | 1  | 0 | -2.839952 | -4.437989 | 0.584021  |
| 62 | 6  | 0 | -8.444913 | -0.524204 | 1.107129  |
| 63 | 1  | 0 | -9.537258 | -0.555230 | 1.032771  |
| 64 | 1  | 0 | -8.120218 | -1.438445 | 1.615863  |
| 65 | 1  | 0 | -8.170672 | 0.326272  | 1.739185  |
| 66 | 6  | 0 | -8.243383 | -1.578016 | -1.193907 |
| 67 | 1  | 0 | -7.825885 | -1.477858 | -2.200721 |
| 68 | 1  | 0 | -7.909508 | -2.538579 | -0.786567 |
| 69 | 1  | 0 | -9.334717 | -1.614619 | -1.279713 |
| 70 | 17 | 0 | 5.938310  | -4.234912 | -0.790436 |

Tipp<sub>2</sub>F<sub>2</sub>PyBTM (D<sub>0</sub> state, UB3LYP/6-31G(d, p))

Standard orientation:

| Center<br>Number | Atomic<br>Number | Atomic<br>Type | Coordinates (Angstroms) |           |           |
|------------------|------------------|----------------|-------------------------|-----------|-----------|
|                  |                  |                | X                       | Y         | Z         |
| 1                | 17               | 0              | 2.061101                | 2.689327  | -2.254380 |
| 2                | 17               | 0              | -0.473788               | -0.104064 | -2.249045 |
| 3                | 17               | 0              | 0.473788                | -0.104065 | 2.249045  |
| 4                | 17               | 0              | -2.061101               | 2.689327  | 2.254381  |
| 5                | 7                | 0              | -0.000001               | 6.334424  | 0.000000  |
| 6                | 6                | 0              | 3.512380                | 0.840823  | -0.964799 |
| 7                | 1                | 0              | 4.246709                | 1.069507  | -1.728184 |
| 8                | 6                | 0              | 1.590016                | 0.272712  | 0.940912  |
| 9                | 6                | 0              | -2.304381               | 1.526840  | 0.953551  |
| 10               | 6                | 0              | 0.973536                | 5.639515  | 0.601944  |
| 11               | 1                | 0              | 1.765800                | 6.190116  | 1.101356  |
| 12               | 6                | 0              | 0.000000                | 3.468764  | 0.000000  |
| 13               | 6                | 0              | -3.512380               | 0.840823  | 0.964800  |



|    |   |   |            |           |           |
|----|---|---|------------|-----------|-----------|
| 14 | 6 | 0 | -3.777258  | -0.149637 | 0.011400  |
| 15 | 6 | 0 | 2.304381   | 1.526841  | -0.953550 |
| 16 | 6 | 0 | 1.000419   | 4.252868  | 0.615687  |
| 17 | 6 | 0 | -1.590016  | 0.272712  | -0.940911 |
| 18 | 6 | 0 | -2.793869  | -0.424566 | -0.944145 |
| 19 | 6 | 0 | 2.793869   | -0.424567 | 0.944146  |
| 20 | 6 | 0 | -1.281210  | 1.278868  | 0.004822  |
| 21 | 6 | 0 | 1.281210   | 1.278868  | -0.004821 |
| 22 | 6 | 0 | -1.000420  | 4.252868  | -0.615687 |
| 23 | 6 | 0 | -0.973537  | 5.639514  | -0.601944 |
| 24 | 6 | 0 | 0.000000   | 2.016100  | 0.000000  |
| 25 | 1 | 0 | -1.765801  | 6.190115  | -1.101357 |
| 26 | 6 | 0 | 3.777258   | -0.149637 | -0.011399 |
| 27 | 1 | 0 | -4.246708  | 1.069506  | 1.728185  |
| 28 | 6 | 0 | -5.081304  | -0.891783 | 0.012251  |
| 29 | 6 | 0 | -5.206742  | -2.097612 | 0.741636  |
| 30 | 6 | 0 | -6.179706  | -0.383849 | -0.716415 |
| 31 | 6 | 0 | -6.433043  | -2.770230 | 0.724027  |
| 32 | 6 | 0 | -7.384624  | -1.097962 | -0.698935 |
| 33 | 6 | 0 | -7.536523  | -2.290287 | 0.011090  |
| 34 | 1 | 0 | -6.527517  | -3.696342 | 1.284525  |
| 35 | 1 | 0 | -8.233895  | -0.712781 | -1.257926 |
| 36 | 6 | 0 | 5.081304   | -0.891783 | -0.012250 |
| 37 | 6 | 0 | 5.206742   | -2.097612 | -0.741636 |
| 38 | 6 | 0 | 6.179707   | -0.383849 | 0.716416  |
| 39 | 6 | 0 | 6.433043   | -2.770230 | -0.724027 |
| 40 | 6 | 0 | 7.384624   | -1.097962 | 0.698935  |
| 41 | 6 | 0 | 7.536523   | -2.290287 | -0.011090 |
| 42 | 1 | 0 | 6.527517   | -3.696342 | -1.284526 |
| 43 | 1 | 0 | 8.233896   | -0.712781 | 1.257926  |
| 44 | 1 | 0 | 2.971436   | -1.173866 | 1.706569  |
| 45 | 1 | 0 | -2.971436  | -1.173865 | -1.706569 |
| 46 | 6 | 0 | 6.096997   | 0.912458  | 1.521701  |
| 47 | 1 | 0 | 5.087096   | 1.317029  | 1.409421  |
| 48 | 6 | 0 | 4.048522   | -2.687268 | -1.546128 |
| 49 | 1 | 0 | 3.189427   | -2.018476 | -1.442520 |
| 50 | 6 | 0 | 8.865003   | -3.036007 | -0.004329 |
| 51 | 1 | 0 | 9.553019   | -2.458308 | 0.626287  |
| 52 | 6 | 0 | -6.096996  | 0.912458  | -1.521700 |
| 53 | 1 | 0 | -5.087096  | 1.317031  | -1.409418 |
| 54 | 6 | 0 | -4.048522  | -2.687269 | 1.546128  |
| 55 | 1 | 0 | -3.189428  | -2.018476 | 1.442521  |
| 56 | 6 | 0 | -8.865003  | -3.036006 | 0.004328  |
| 57 | 1 | 0 | -9.553019  | -2.458308 | -0.626288 |
| 58 | 9 | 0 | -2.009546  | 3.645964  | -1.266452 |
| 59 | 9 | 0 | 2.009546   | 3.645965  | 1.266452  |
| 60 | 6 | 0 | 7.072281   | 1.978642  | 0.987215  |
| 61 | 1 | 0 | 8.114352   | 1.656794  | 1.087484  |
| 62 | 1 | 0 | 6.887776   | 2.189777  | -0.070916 |
| 63 | 1 | 0 | 6.957847   | 2.914217  | 1.545163  |
| 64 | 6 | 0 | 6.318982   | 0.663245  | 3.025822  |
| 65 | 1 | 0 | 5.598850   | -0.061960 | 3.417941  |
| 66 | 1 | 0 | 7.324595   | 0.277805  | 3.225286  |
| 67 | 1 | 0 | 6.202322   | 1.595782  | 3.588375  |
| 68 | 6 | 0 | 4.379366   | -2.766605 | -3.048736 |
| 69 | 1 | 0 | 4.644690   | -1.782786 | -3.448679 |
| 70 | 1 | 0 | 5.218808   | -3.443320 | -3.241021 |
| 71 | 1 | 0 | 3.516120   | -3.139867 | -3.610137 |
| 72 | 6 | 0 | 3.618574   | -4.062323 | -1.000203 |
| 73 | 1 | 0 | 4.423628   | -4.799543 | -1.089880 |
| 74 | 1 | 0 | 3.338965   | -3.999597 | 0.056295  |
| 75 | 1 | 0 | 2.755705   | -4.441926 | -1.557944 |
| 76 | 6 | 0 | 9.484673   | -3.114659 | -1.412220 |
| 77 | 1 | 0 | 10.465417  | -3.600918 | -1.374264 |
| 78 | 1 | 0 | 8.852026   | -3.694526 | -2.093109 |
| 79 | 1 | 0 | 9.615486   | -2.117465 | -1.844067 |
| 80 | 6 | 0 | 8.733212   | -4.437803 | 0.619873  |
| 81 | 1 | 0 | 8.327558   | -4.383379 | 1.635010  |
| 82 | 1 | 0 | 8.069160   | -5.076458 | 0.027207  |
| 83 | 1 | 0 | 9.710450   | -4.930004 | 0.669414  |
| 84 | 6 | 0 | -9.484673  | -3.114657 | 1.412219  |
| 85 | 1 | 0 | -9.615487  | -2.117462 | 1.844066  |
| 86 | 1 | 0 | -10.465418 | -3.600916 | 1.374264  |
| 87 | 1 | 0 | -8.852027  | -3.694524 | 2.093109  |
| 88 | 6 | 0 | -8.733213  | -4.437803 | -0.619873 |
| 89 | 1 | 0 | -8.327558  | -4.383379 | -1.635009 |
| 90 | 1 | 0 | -8.069161  | -5.076458 | -0.027205 |

|     |   |   |           |           |           |
|-----|---|---|-----------|-----------|-----------|
| 91  | 1 | 0 | -9.710451 | -4.930003 | -0.669413 |
| 92  | 6 | 0 | -3.618573 | -4.062322 | 1.000201  |
| 93  | 1 | 0 | -4.423627 | -4.799543 | 1.089877  |
| 94  | 1 | 0 | -3.338964 | -3.999596 | -0.056297 |
| 95  | 1 | 0 | -2.755705 | -4.441926 | 1.557942  |
| 96  | 6 | 0 | -4.379366 | -2.766608 | 3.048736  |
| 97  | 1 | 0 | -4.644691 | -1.782789 | 3.448680  |
| 98  | 1 | 0 | -5.218808 | -3.443324 | 3.241019  |
| 99  | 1 | 0 | -3.516121 | -3.139870 | 3.610136  |
| 100 | 6 | 0 | -7.072283 | 1.978642  | -0.987217 |
| 101 | 1 | 0 | -8.114353 | 1.656793  | -1.087489 |
| 102 | 1 | 0 | -6.887780 | 2.189776  | 0.070913  |
| 103 | 1 | 0 | -6.957848 | 2.914216  | -1.545166 |
| 104 | 6 | 0 | -6.318978 | 0.663244  | -3.025822 |
| 105 | 1 | 0 | -5.598844 | -0.061960 | -3.417939 |
| 106 | 1 | 0 | -7.324590 | 0.277802  | -3.225288 |
| 107 | 1 | 0 | -6.202318 | 1.595781  | -3.588376 |

Ph\*F<sub>2</sub>PyBTM (D<sub>0</sub> state, UB3LYP/6-31G(d, p))

Standard orientation:

| Center<br>Number | Atomic<br>Number | Atomic<br>Type | Coordinates (Angstroms) |           |           |
|------------------|------------------|----------------|-------------------------|-----------|-----------|
|                  |                  |                | X                       | Y         | Z         |
| 1                | 17               | 0              | 0.116884                | 1.694415  | 2.477048  |
| 2                | 17               | 0              | 1.433395                | -1.814972 | 2.069317  |
| 3                | 17               | 0              | 0.614708                | -0.937730 | -2.363246 |
| 4                | 17               | 0              | 4.002809                | 0.703529  | -2.129102 |
| 5                | 7                | 0              | 3.413888                | 4.555212  | 0.597588  |
| 6                | 6                | 0              | -1.900359               | 0.686783  | 1.026506  |
| 7                | 1                | 0              | -2.507899               | 1.080313  | 1.832944  |
| 8                | 6                | 0              | -0.300866               | -0.327808 | -0.988728 |
| 9                | 6                | 0              | 3.777609                | -0.610237 | -0.985070 |
| 10               | 6                | 0              | 2.260595                | 4.348289  | -0.050354 |
| 11               | 1                | 0              | 1.736892                | 5.208935  | -0.456823 |
| 12               | 6                | 0              | 2.349840                | 1.916547  | 0.263820  |
| 13               | 6                | 0              | 4.644741                | -1.687902 | -1.123610 |
| 14               | 6                | 0              | 4.479384                | -2.791010 | -0.291679 |
| 15               | 6                | 0              | -0.523719               | 0.869814  | 1.058392  |
| 16               | 6                | 0              | 1.720440                | 3.082667  | -0.224854 |
| 17               | 6                | 0              | 2.620826                | -1.728153 | 0.779125  |
| 18               | 6                | 0              | 3.471100                | -2.824451 | 0.664540  |
| 19               | 6                | 0              | -1.677738               | -0.519913 | -1.035989 |
| 20               | 6                | 0              | 2.725187                | -0.575186 | -0.035603 |
| 21               | 6                | 0              | 0.346777                | 0.372768  | 0.056478  |
| 22               | 6                | 0              | 3.561170                | 2.194128  | 0.934517  |
| 23               | 6                | 0              | 4.051592                | 3.482868  | 1.083610  |
| 24               | 6                | 0              | 1.809653                | 0.578436  | 0.095898  |
| 25               | 1                | 0              | 4.984580                | 3.637011  | 1.618334  |
| 26               | 6                | 0              | -2.501864               | -0.012626 | -0.026321 |
| 27               | 1                | 0              | 5.421414                | -1.670491 | -1.877065 |
| 28               | 6                | 0              | -3.989307               | -0.206322 | -0.071259 |
| 29               | 6                | 0              | -4.559051               | -1.353973 | 0.518117  |
| 30               | 6                | 0              | -4.795187               | 0.769804  | -0.693393 |
| 31               | 6                | 0              | -5.956119               | -1.530761 | 0.469000  |
| 32               | 6                | 0              | -6.191113               | 0.583793  | -0.735681 |
| 33               | 6                | 0              | -6.764330               | -0.577898 | -0.181891 |
| 34               | 1                | 0              | -2.111081               | -1.053400 | -1.873812 |
| 35               | 1                | 0              | 3.355002                | -3.675789 | 1.322512  |
| 36               | 6                | 0              | -4.176636               | 2.004599  | -1.320814 |
| 37               | 1                | 0              | -4.479210               | 2.918163  | -0.795117 |
| 38               | 1                | 0              | -3.087826               | 1.969612  | -1.305974 |
| 39               | 1                | 0              | -4.487568               | 2.120854  | -2.364371 |
| 40               | 6                | 0              | -3.686967               | -2.394205 | 1.194968  |
| 41               | 1                | 0              | -2.625918               | -2.176537 | 1.078095  |
| 42               | 1                | 0              | -3.890274               | -2.451437 | 2.270961  |
| 43               | 1                | 0              | -3.864261               | -3.393864 | 0.784419  |
| 44               | 6                | 0              | -8.260252               | -0.801001 | -0.284138 |
| 45               | 1                | 0              | -8.510820               | -1.863076 | -0.302935 |
| 46               | 1                | 0              | -8.796880               | -0.358561 | 0.566293  |
| 47               | 1                | 0              | -8.674156               | -0.354520 | -1.190257 |
| 48               | 9                | 0              | 4.262750                | 1.182055  | 1.476018  |

|    |    |   |           |           |           |
|----|----|---|-----------|-----------|-----------|
| 49 | 9  | 0 | 0.567666  | 2.975158  | -0.909345 |
| 50 | 6  | 0 | -7.085187 | 1.626760  | -1.377323 |
| 51 | 1  | 0 | -6.583132 | 2.587826  | -1.486696 |
| 52 | 1  | 0 | -7.414953 | 1.318921  | -2.378546 |
| 53 | 1  | 0 | -7.988138 | 1.798076  | -0.784621 |
| 54 | 6  | 0 | -6.599861 | -2.743481 | 1.112586  |
| 55 | 1  | 0 | -6.896870 | -3.490574 | 0.364652  |
| 56 | 1  | 0 | -5.931036 | -3.240951 | 1.814424  |
| 57 | 1  | 0 | -7.503886 | -2.470216 | 1.664281  |
| 58 | 17 | 0 | 5.560611  | -4.159105 | -0.452192 |

-----

Ph\*<sub>2</sub>F<sub>2</sub>PyBTM (D<sub>0</sub> state, UB3LYP/6-31G(d, p))

Standard orientation:

| Center<br>Number | Atomic<br>Number | Atomic<br>Type | Coordinates (Angstroms) |           |           |
|------------------|------------------|----------------|-------------------------|-----------|-----------|
|                  |                  |                | X                       | Y         | Z         |
| 1                | 17               | 0              | 2.044129                | 2.361006  | -2.269829 |
| 2                | 17               | 0              | -0.490348               | -0.435088 | -2.244304 |
| 3                | 17               | 0              | 0.490350                | -0.435088 | 2.244305  |
| 4                | 17               | 0              | -2.044131               | 2.361006  | 2.269829  |
| 5                | 7                | 0              | -0.000002               | 6.005671  | -0.000002 |
| 6                | 6                | 0              | 3.507859                | 0.516921  | -0.987143 |
| 7                | 1                | 0              | 4.237135                | 0.746972  | -1.755005 |
| 8                | 6                | 0              | 1.598401                | -0.055123 | 0.929573  |
| 9                | 6                | 0              | -2.298256               | 1.199914  | 0.969147  |
| 10               | 6                | 0              | 0.976688                | 5.310630  | 0.596706  |
| 11               | 1                | 0              | 1.771614                | 5.861174  | 1.091961  |
| 12               | 6                | 0              | -0.000001               | 3.139802  | -0.000001 |
| 13               | 6                | 0              | -3.507859               | 0.516918  | 0.987144  |
| 14               | 6                | 0              | -3.781699               | -0.471711 | 0.034902  |
| 15               | 6                | 0              | 2.298256                | 1.199916  | -0.969147 |
| 16               | 6                | 0              | 1.003615                | 3.923980  | 0.610312  |
| 17               | 6                | 0              | -1.598400               | -0.055124 | -0.929572 |
| 18               | 6                | 0              | -2.804145               | -0.748942 | -0.925981 |
| 19               | 6                | 0              | 2.804146                | -0.748939 | 0.925981  |
| 20               | 6                | 0              | -1.281461               | 0.950625  | 0.014053  |
| 21               | 6                | 0              | 1.281461                | 0.950626  | -0.014052 |
| 22               | 6                | 0              | -1.003618               | 3.923979  | -0.610315 |
| 23               | 6                | 0              | -0.976692               | 5.310629  | -0.596710 |
| 24               | 6                | 0              | 0.000000                | 1.686995  | 0.000000  |
| 25               | 1                | 0              | -1.771617               | 5.861171  | -1.091966 |
| 26               | 6                | 0              | 3.781700                | -0.471708 | -0.034902 |
| 27               | 1                | 0              | -4.237135               | 0.746969  | 1.755006  |
| 28               | 6                | 0              | -5.089713               | -1.207393 | 0.043016  |
| 29               | 6                | 0              | -5.207150               | -2.409056 | 0.771901  |
| 30               | 6                | 0              | -6.185329               | -0.678308 | -0.670534 |
| 31               | 6                | 0              | -6.437583               | -3.095640 | 0.772838  |
| 32               | 6                | 0              | -7.411372               | -1.372484 | -0.662396 |
| 33               | 6                | 0              | -7.525850               | -2.592198 | 0.033292  |
| 34               | 6                | 0              | 5.089714                | -1.207390 | -0.043015 |
| 35               | 6                | 0              | 5.207154                | -2.409046 | -0.771909 |
| 36               | 6                | 0              | 6.185328                | -0.678310 | 0.670544  |
| 37               | 6                | 0              | 6.437588                | -3.095630 | -0.772850 |
| 38               | 6                | 0              | 7.411368                | -1.372490 | 0.662408  |
| 39               | 6                | 0              | 7.525850                | -2.592197 | -0.033291 |
| 40               | 1                | 0              | 2.988304                | -1.497660 | 1.687490  |
| 41               | 1                | 0              | -2.988302               | -1.497662 | -1.687490 |
| 42               | 6                | 0              | 6.053893                | 0.617192  | 1.448676  |
| 43               | 1                | 0              | 6.685617                | 1.407339  | 1.025456  |
| 44               | 1                | 0              | 5.030221                | 0.990045  | 1.452481  |
| 45               | 1                | 0              | 6.361121                | 0.489535  | 2.492003  |
| 46               | 6                | 0              | 4.027716                | -2.967289 | -1.545157 |
| 47               | 1                | 0              | 3.119964                | -2.388013 | -1.380061 |
| 48               | 1                | 0              | 4.219290                | -2.970408 | -2.624844 |
| 49               | 1                | 0              | 3.814021                | -4.002117 | -1.257406 |
| 50               | 6                | 0              | 8.829125                | -3.365311 | 0.011274  |
| 51               | 1                | 0              | 8.665510                | -4.439834 | -0.088583 |
| 52               | 1                | 0              | 9.507887                | -3.066408 | -0.799240 |
| 53               | 1                | 0              | 9.362371                | -3.204841 | 0.950122  |
| 54               | 6                | 0              | -6.053896               | 0.617197  | -1.448661 |
| 55               | 1                | 0              | -6.685602               | 1.407349  | -1.025423 |

|    |   |   |           |           |           |
|----|---|---|-----------|-----------|-----------|
| 56 | 1 | 0 | -5.030220 | 0.990040  | -1.452485 |
| 57 | 1 | 0 | -6.361148 | 0.489549  | -2.491982 |
| 58 | 6 | 0 | -4.027708 | -2.967301 | 1.545143  |
| 59 | 1 | 0 | -3.119963 | -2.388012 | 1.380063  |
| 60 | 1 | 0 | -4.219288 | -2.970446 | 2.624829  |
| 61 | 1 | 0 | -3.813999 | -4.002120 | 1.257371  |
| 62 | 6 | 0 | -8.829123 | -3.365315 | -0.011266 |
| 63 | 1 | 0 | -8.665497 | -4.439842 | 0.088537  |
| 64 | 1 | 0 | -9.507857 | -3.066456 | 0.799289  |
| 65 | 1 | 0 | -9.362404 | -3.204806 | -0.950087 |
| 66 | 9 | 0 | -2.016191 | 3.317251  | -1.256043 |
| 67 | 9 | 0 | 2.016189  | 3.317253  | 1.256040  |
| 68 | 6 | 0 | 8.613094  | -0.816598 | 1.401263  |
| 69 | 1 | 0 | 8.498997  | 0.241703  | 1.634946  |
| 70 | 1 | 0 | 8.784309  | -1.340425 | 2.351122  |
| 71 | 1 | 0 | 9.528142  | -0.921696 | 0.811609  |
| 72 | 6 | 0 | 6.600498  | -4.378027 | -1.565399 |
| 73 | 1 | 0 | 6.571822  | -5.263297 | -0.916275 |
| 74 | 1 | 0 | 5.816652  | -4.502667 | -2.312117 |
| 75 | 1 | 0 | 7.558069  | -4.402610 | -2.093221 |
| 76 | 6 | 0 | -6.600497 | -4.378048 | 1.565370  |
| 77 | 1 | 0 | -6.571908 | -5.263303 | 0.916223  |
| 78 | 1 | 0 | -5.816608 | -4.502742 | 2.312032  |
| 79 | 1 | 0 | -7.558036 | -4.402598 | 2.093254  |
| 80 | 6 | 0 | -8.613098 | -0.816577 | -1.401238 |
| 81 | 1 | 0 | -8.499015 | 0.241738  | -1.634865 |
| 82 | 1 | 0 | -8.784292 | -1.340358 | -2.351126 |
| 83 | 1 | 0 | -9.528152 | -0.921718 | -0.811602 |

Xyl<sub>2</sub>F<sub>2</sub>PyBTM (D<sub>0</sub> state, UB3LYP/6-31G(d, p))

Standard orientation:

| Center<br>Number | Atomic<br>Number | Atomic<br>Type | Coordinates (Angstroms) |           |           |
|------------------|------------------|----------------|-------------------------|-----------|-----------|
|                  |                  |                | X                       | Y         | Z         |
| 1                | 17               | 0              | -2.113968               | 2.036307  | 2.203699  |
| 2                | 17               | 0              | 0.476285                | -0.730059 | 2.250103  |
| 3                | 17               | 0              | -0.364918               | -0.759528 | -2.238778 |
| 4                | 17               | 0              | 2.120145                | 2.120256  | -2.197228 |
| 5                | 7                | 0              | -0.067926               | 5.710751  | 0.003952  |
| 6                | 6                | 0              | -3.501350               | 0.162698  | 0.884871  |
| 7                | 1                | 0              | -4.241938               | 0.372863  | 1.645876  |
| 8                | 6                | 0              | -1.517841               | -0.392729 | -0.959119 |
| 9                | 6                | 0              | 2.350811                | 0.953446  | -0.897229 |
| 10               | 6                | 0              | -1.010017               | 4.998225  | -0.626738 |
| 11               | 1                | 0              | -1.797550               | 5.534327  | -1.148933 |
| 12               | 6                | 0              | -0.013913               | 2.845517  | 0.001943  |
| 13               | 6                | 0              | 3.565242                | 0.282187  | -0.889774 |
| 14               | 6                | 0              | 3.824343                | -0.724095 | 0.052693  |
| 15               | 6                | 0              | -2.307069               | 0.869242  | 0.897499  |
| 16               | 6                | 0              | -1.010131               | 3.611268  | -0.642184 |
| 17               | 6                | 0              | 1.609801                | -0.334265 | 0.961519  |
| 18               | 6                | 0              | 2.819936                | -1.016922 | 0.984068  |
| 19               | 6                | 0              | -2.707319               | -1.110495 | -0.986720 |
| 20               | 6                | 0              | 1.306304                | 0.679628  | 0.021145  |
| 21               | 6                | 0              | -1.251928               | 0.632076  | -0.019393 |
| 22               | 6                | 0              | 0.952745                | 3.647368  | 0.647161  |
| 23               | 6                | 0              | 0.900372                | 5.033356  | 0.633676  |
| 24               | 6                | 0              | 0.013474                | 1.392189  | 0.001207  |
| 25               | 1                | 0              | 1.667137                | 5.598030  | 1.156659  |
| 26               | 6                | 0              | -3.728063               | -0.844109 | -0.064344 |
| 27               | 1                | 0              | 4.305204                | 0.520664  | -1.644250 |
| 28               | 6                | 0              | 5.144539                | -1.409144 | 0.071846  |
| 29               | 6                | 0              | 5.283156                | -2.816003 | 0.116350  |
| 30               | 6                | 0              | 6.304025                | -0.615261 | 0.023700  |
| 31               | 6                | 0              | 6.575765                | -3.356770 | 0.124075  |
| 32               | 6                | 0              | 7.574749                | -1.179302 | 0.040489  |
| 33               | 6                | 0              | 7.731887                | -2.569794 | 0.097295  |
| 34               | 1                | 0              | 6.680536                | -4.439416 | 0.139809  |
| 35               | 1                | 0              | 8.449591                | -0.535353 | 0.009563  |
| 36               | 6                | 0              | -4.981139               | -1.645486 | -0.081124 |
| 37               | 6                | 0              | -4.872000               | -3.046033 | -0.137906 |

|    |   |   |           |           |           |
|----|---|---|-----------|-----------|-----------|
| 38 | 6 | 0 | -6.269579 | -1.062315 | -0.062413 |
| 39 | 6 | 0 | -5.995984 | -3.864453 | -0.154109 |
| 40 | 6 | 0 | -7.384007 | -1.911135 | -0.087515 |
| 41 | 6 | 0 | -7.279761 | -3.305690 | -0.122759 |
| 42 | 1 | 0 | -5.875000 | -4.943802 | -0.190902 |
| 43 | 1 | 0 | -8.374090 | -1.460499 | -0.091589 |
| 44 | 1 | 0 | -2.853022 | -1.860814 | -1.754464 |
| 45 | 1 | 0 | 2.991030  | -1.751936 | 1.760081  |
| 46 | 6 | 0 | -6.499207 | 0.433713  | -0.056120 |
| 47 | 1 | 0 | -6.484666 | 0.845593  | 0.959926  |
| 48 | 1 | 0 | -5.740581 | 0.969620  | -0.632136 |
| 49 | 1 | 0 | -7.478559 | 0.668475  | -0.481477 |
| 50 | 6 | 0 | -8.510827 | -4.179463 | -0.111997 |
| 51 | 1 | 0 | -8.366101 | -5.080640 | -0.715375 |
| 52 | 1 | 0 | -8.750727 | -4.508000 | 0.906881  |
| 53 | 1 | 0 | -9.384297 | -3.645616 | -0.496513 |
| 54 | 6 | 0 | 4.102693  | -3.763240 | 0.116691  |
| 55 | 1 | 0 | 3.720378  | -3.939876 | 1.129031  |
| 56 | 1 | 0 | 3.269825  | -3.384169 | -0.480870 |
| 57 | 1 | 0 | 4.397094  | -4.735510 | -0.287313 |
| 58 | 6 | 0 | 9.103711  | -3.198339 | 0.143148  |
| 59 | 1 | 0 | 9.082817  | -4.231846 | -0.213433 |
| 60 | 1 | 0 | 9.819632  | -2.639085 | -0.466713 |
| 61 | 1 | 0 | 9.495119  | -3.213469 | 1.167912  |
| 62 | 9 | 0 | 1.953372  | 3.058530  | 1.326764  |
| 63 | 9 | 0 | -1.988042 | 2.986194  | -1.322648 |
| 64 | 1 | 0 | 6.200700  | 0.465483  | -0.008291 |
| 65 | 1 | 0 | -3.883800 | -3.496600 | -0.150320 |

Biph<sub>2</sub>F<sub>2</sub>PyBTM (D<sub>0</sub> state, UB3LYP/6-31G(d, p))

Standard orientation:

| Center<br>Number | Atomic<br>Number | Atomic<br>Type | Coordinates (Angstroms) |           |           |
|------------------|------------------|----------------|-------------------------|-----------|-----------|
|                  |                  |                | X                       | Y         | Z         |
| 1                | 17               | 0              | 2.199038                | 1.547266  | -2.249724 |
| 2                | 17               | 0              | -0.991130               | -0.497212 | -2.213106 |
| 3                | 17               | 0              | -0.146584               | -0.607020 | 2.274555  |
| 4                | 17               | 0              | -1.846331               | 2.790855  | 2.153088  |
| 5                | 7                | 0              | 1.144202                | 5.669787  | -0.148467 |
| 6                | 6                | 0              | 3.099622                | -0.566404 | -0.874592 |
| 7                | 1                | 0              | 3.876703                | -0.558101 | -1.628206 |
| 8                | 6                | 0              | 1.050784                | -0.570178 | 0.984131  |
| 9                | 6                | 0              | -2.368100               | 1.686291  | 0.883589  |
| 10               | 6                | 0              | 1.885950                | 4.763225  | 0.500235  |
| 11               | 1                | 0              | 2.785895                | 5.101369  | 1.006210  |
| 12               | 6                | 0              | 0.383523                | 2.908067  | -0.067601 |
| 13               | 6                | 0              | -3.713400               | 1.342781  | 0.890344  |
| 14               | 6                | 0              | -4.217857               | 0.409365  | -0.025255 |
| 15               | 6                | 0              | 2.111996                | 0.406030  | -0.910321 |
| 16               | 6                | 0              | 1.543534                | 3.420125  | 0.553820  |
| 17               | 6                | 0              | -1.983835               | 0.204392  | -0.939348 |
| 18               | 6                | 0              | -3.325064               | -0.154861 | -0.945224 |
| 19               | 6                | 0              | 2.029594                | -1.556537 | 1.032972  |
| 20               | 6                | 0              | -1.431564               | 1.136543  | -0.026230 |
| 21               | 6                | 0              | 1.036884                | 0.459560  | 0.014168  |
| 22               | 6                | 0              | -0.359943               | 3.906826  | -0.733518 |
| 23               | 6                | 0              | 0.033499                | 5.236629  | -0.758180 |
| 24               | 6                | 0              | -0.002492               | 1.507117  | -0.026960 |
| 25               | 1                | 0              | -0.573948               | 5.959441  | -1.295614 |
| 26               | 6                | 0              | 3.077946                | -1.568809 | 0.105532  |
| 27               | 1                | 0              | -4.366974               | 1.782133  | 1.634388  |
| 28               | 6                | 0              | -5.673003               | 0.093286  | -0.053158 |
| 29               | 6                | 0              | -6.181551               | -1.228376 | -0.116902 |
| 30               | 6                | 0              | -6.573962               | 1.172131  | -0.065429 |
| 31               | 6                | 0              | -7.571151               | -1.405933 | -0.222526 |
| 32               | 6                | 0              | -7.949000               | 0.973230  | -0.160080 |
| 33               | 6                | 0              | -8.450163               | -0.325325 | -0.247547 |
| 34               | 1                | 0              | -7.963709               | -2.417624 | -0.255318 |
| 35               | 1                | 0              | -8.619898               | 1.826491  | -0.175996 |
| 36               | 6                | 0              | 4.094463                | -2.656894 | 0.131545  |
| 37               | 6                | 0              | 3.631134                | -3.982399 | 0.191827  |

|    |   |   |           |           |           |
|----|---|---|-----------|-----------|-----------|
| 38 | 6 | 0 | 5.489581  | -2.417912 | 0.053380  |
| 39 | 6 | 0 | 4.508106  | -5.063598 | 0.154940  |
| 40 | 6 | 0 | 6.355604  | -3.523149 | 0.007301  |
| 41 | 6 | 0 | 5.879660  | -4.831739 | 0.053844  |
| 42 | 1 | 0 | 4.120736  | -6.076919 | 0.194432  |
| 43 | 1 | 0 | 7.425310  | -3.342663 | -0.035986 |
| 44 | 1 | 0 | 1.991779  | -2.298975 | 1.821120  |
| 45 | 1 | 0 | -3.679552 | -0.856894 | -1.689076 |
| 46 | 9 | 0 | -1.480707 | 3.566193  | -1.395225 |
| 47 | 9 | 0 | 2.342283  | 2.591092  | 1.249887  |
| 48 | 1 | 0 | -6.180319 | 2.183524  | -0.034625 |
| 49 | 1 | 0 | 2.561103  | -4.161702 | 0.233953  |
| 50 | 1 | 0 | -9.519204 | -0.498925 | -0.323864 |
| 51 | 1 | 0 | 6.577587  | -5.662844 | 0.022255  |
| 52 | 6 | 0 | 6.092417  | -1.053105 | 0.065023  |
| 53 | 6 | 0 | 7.048423  | -0.694792 | -0.899941 |
| 54 | 6 | 0 | 5.768134  | -0.119116 | 1.063430  |
| 55 | 6 | 0 | 7.653847  | 0.562326  | -0.874705 |
| 56 | 1 | 0 | 7.306085  | -1.402398 | -1.682631 |
| 57 | 6 | 0 | 6.375748  | 1.135462  | 1.090673  |
| 58 | 1 | 0 | 5.044922  | -0.382858 | 1.828561  |
| 59 | 6 | 0 | 7.319297  | 1.482238  | 0.120568  |
| 60 | 1 | 0 | 8.384157  | 0.822784  | -1.635200 |
| 61 | 1 | 0 | 6.114732  | 1.841231  | 1.873762  |
| 62 | 1 | 0 | 7.790016  | 2.460567  | 0.141339  |
| 63 | 6 | 0 | -5.324123 | -2.446289 | -0.028611 |
| 64 | 6 | 0 | -5.459431 | -3.476078 | -0.974467 |
| 65 | 6 | 0 | -4.412081 | -2.622439 | 1.025515  |
| 66 | 6 | 0 | -4.698980 | -4.642106 | -0.875982 |
| 67 | 1 | 0 | -6.155538 | -3.353585 | -1.799180 |
| 68 | 6 | 0 | -3.655756 | -3.789397 | 1.126400  |
| 69 | 1 | 0 | -4.305737 | -1.845843 | 1.776276  |
| 70 | 6 | 0 | -3.794313 | -4.802924 | 0.174942  |
| 71 | 1 | 0 | -4.812534 | -5.422766 | -1.622450 |
| 72 | 1 | 0 | -2.960879 | -3.908843 | 1.952439  |
| 73 | 1 | 0 | -3.203064 | -5.710366 | 0.253283  |

TippPyBTM (D<sub>1</sub> state, UB3LYP/6-31G(d, p))

Standard orientation:

| Center<br>Number | Atomic<br>Number | Atomic<br>Type | Coordinates (Angstroms) |           |           |
|------------------|------------------|----------------|-------------------------|-----------|-----------|
|                  |                  |                | X                       | Y         | Z         |
| 1                | 17               | 0              | -0.634731               | -1.934831 | 2.287712  |
| 2                | 17               | 0              | -1.449383               | 1.835400  | 1.967561  |
| 3                | 17               | 0              | -0.922369               | 1.115112  | -2.314323 |
| 4                | 17               | 0              | -4.622650               | -0.315826 | -2.026354 |
| 5                | 7                | 0              | -4.135284               | -4.404372 | 0.278158  |
| 6                | 6                | 0              | 1.448421                | -0.942690 | 0.942320  |
| 7                | 1                | 0              | 2.020167                | -1.446264 | 1.712313  |
| 8                | 6                | 0              | -0.063635               | 0.376153  | -0.974630 |
| 9                | 6                | 0              | -4.141871               | 0.943411  | -0.891940 |
| 10               | 6                | 0              | -3.015521               | -4.194961 | -0.425939 |
| 11               | 1                | 0              | -2.592373               | -5.048524 | -0.949447 |
| 12               | 6                | 0              | -2.885007               | -1.772837 | 0.103507  |
| 13               | 6                | 0              | -4.879133               | 2.120031  | -0.968020 |
| 14               | 6                | 0              | -4.506097               | 3.201593  | -0.177296 |
| 15               | 6                | 0              | 0.069993                | -1.023607 | 0.966081  |
| 16               | 6                | 0              | -2.402559               | -2.956589 | -0.542266 |
| 17               | 6                | 0              | -2.729750               | 1.902539  | 0.756278  |
| 18               | 6                | 0              | -3.421460               | 3.106733  | 0.686803  |
| 19               | 6                | 0              | 1.306233                | 0.553984  | -0.951503 |
| 20               | 6                | 0              | -3.028879               | 0.749678  | -0.022250 |
| 21               | 6                | 0              | -0.783159               | -0.389668 | -0.000461 |
| 22               | 6                | 0              | -4.074246               | -2.064554 | 0.849245  |
| 23               | 6                | 0              | -4.641676               | -3.328735 | 0.898626  |
| 24               | 6                | 0              | -2.250015               | -0.487861 | 0.030175  |
| 25               | 1                | 0              | -5.539100               | -3.480608 | 1.492931  |
| 26               | 6                | 0              | 2.105657                | -0.123970 | -0.002522 |
| 27               | 1                | 0              | -5.709411               | 2.198057  | -1.658226 |
| 28               | 6                | 0              | 3.564898                | 0.014019  | -0.008100 |
| 29               | 6                | 0              | 4.172025                | 1.322529  | 0.059737  |

|    |    |   |           |           |           |
|----|----|---|-----------|-----------|-----------|
| 30 | 6  | 0 | 4.405934  | -1.160417 | -0.084978 |
| 31 | 6  | 0 | 5.552813  | 1.412611  | 0.047711  |
| 32 | 6  | 0 | 5.781795  | -0.990852 | -0.084461 |
| 33 | 6  | 0 | 6.387989  | 0.275984  | -0.023060 |
| 34 | 1  | 0 | 6.014498  | 2.390731  | 0.128016  |
| 35 | 1  | 0 | 6.423198  | -1.862151 | -0.167647 |
| 36 | 1  | 0 | 1.774631  | 1.151431  | -1.724314 |
| 37 | 1  | 0 | -3.137818 | 3.938269  | 1.319128  |
| 38 | 6  | 0 | 3.852456  | -2.567433 | -0.290683 |
| 39 | 1  | 0 | 2.762881  | -2.524147 | -0.261219 |
| 40 | 6  | 0 | 3.365791  | 2.603927  | 0.265145  |
| 41 | 1  | 0 | 2.303733  | 2.354373  | 0.256610  |
| 42 | 6  | 0 | 7.893406  | 0.412132  | -0.032449 |
| 43 | 1  | 0 | 8.311149  | -0.598903 | -0.097222 |
| 44 | 6  | 0 | 4.311002  | -3.535893 | 0.816475  |
| 45 | 1  | 0 | 5.396789  | -3.674250 | 0.811613  |
| 46 | 1  | 0 | 4.023446  | -3.178462 | 1.810093  |
| 47 | 1  | 0 | 3.850855  | -4.516542 | 0.662597  |
| 48 | 6  | 0 | 4.229889  | -3.100996 | -1.689902 |
| 49 | 1  | 0 | 3.874816  | -2.431430 | -2.478913 |
| 50 | 1  | 0 | 5.313611  | -3.210572 | -1.799531 |
| 51 | 1  | 0 | 3.774022  | -4.083404 | -1.845915 |
| 52 | 6  | 0 | 3.658238  | 3.216994  | 1.650961  |
| 53 | 1  | 0 | 3.449689  | 2.502752  | 2.453037  |
| 54 | 1  | 0 | 4.703436  | 3.530666  | 1.739599  |
| 55 | 1  | 0 | 3.028542  | 4.098163  | 1.807257  |
| 56 | 6  | 0 | 3.612341  | 3.627139  | -0.859753 |
| 57 | 1  | 0 | 4.652053  | 3.969447  | -0.876361 |
| 58 | 1  | 0 | 3.382970  | 3.208011  | -1.844426 |
| 59 | 1  | 0 | 2.976863  | 4.504885  | -0.708257 |
| 60 | 6  | 0 | 8.408059  | 1.049876  | 1.276460  |
| 61 | 1  | 0 | 9.501872  | 1.074746  | 1.266296  |
| 62 | 1  | 0 | 8.050594  | 2.078195  | 1.389849  |
| 63 | 1  | 0 | 8.086658  | 0.478209  | 2.151729  |
| 64 | 6  | 0 | 8.380229  | 1.204188  | -1.264557 |
| 65 | 1  | 0 | 8.042563  | 0.739745  | -2.195424 |
| 66 | 1  | 0 | 8.017781  | 2.236889  | -1.247411 |
| 67 | 1  | 0 | 9.473961  | 1.233513  | -1.273528 |
| 68 | 17 | 0 | -1.019270 | -2.882211 | -1.638572 |
| 69 | 17 | 0 | -4.843078 | -0.846467 | 1.870866  |
| 70 | 17 | 0 | -5.413815 | 4.704294  | -0.273294 |

Tipp<sub>2</sub>PyBTM (D<sub>1</sub> state, UB3LYP/6-31G(d, p))

Standard orientation:

| Center Number | Atomic Number | Atomic Type | Coordinates (Angstroms) |           |           |
|---------------|---------------|-------------|-------------------------|-----------|-----------|
|               |               |             | X                       | Y         | Z         |
| 1             | 17            | 0           | 2.170105                | 2.824387  | -2.034916 |
| 2             | 17            | 0           | -0.317955               | -0.155442 | -2.112958 |
| 3             | 17            | 0           | 0.404312                | -0.281096 | 2.187707  |
| 4             | 17            | 0           | -2.196095               | 2.731670  | 2.219129  |
| 5             | 7             | 0           | 0.164124                | 6.370854  | 0.346117  |
| 6             | 6             | 0           | 3.530159                | 0.834039  | -0.886917 |
| 7             | 1             | 0           | 4.286972                | 1.106439  | -1.612457 |
| 8             | 6             | 0           | 1.536104                | 0.135453  | 0.913502  |
| 9             | 6             | 0           | -2.337030               | 1.531130  | 0.931395  |
| 10            | 6             | 0           | 1.049443                | 5.589513  | 0.978230  |
| 11            | 1             | 0           | 1.811234                | 6.085544  | 1.574377  |
| 12            | 6             | 0           | 0.052702                | 3.457826  | 0.184119  |
| 13            | 6             | 0           | -3.532396               | 0.822424  | 0.901765  |
| 14            | 6             | 0           | -3.728053               | -0.219215 | -0.012993 |
| 15            | 6             | 0           | 2.345458                | 1.541145  | -0.853483 |
| 16            | 6             | 0           | 1.018220                | 4.204094  | 0.934913  |
| 17            | 6             | 0           | -1.509802               | 0.235023  | -0.867008 |
| 18            | 6             | 0           | -2.683936               | -0.507897 | -0.898343 |
| 19            | 6             | 0           | 2.670568                | -0.645911 | 0.821519  |
| 20            | 6             | 0           | -1.248499               | 1.292698  | 0.045444  |
| 21            | 6             | 0           | 1.271519                | 1.260522  | 0.063212  |
| 22            | 6             | 0           | -0.855338               | 4.348750  | -0.477944 |
| 23            | 6             | 0           | -0.772475               | 5.728191  | -0.367517 |
| 24            | 6             | 0           | 0.019452                | 2.026667  | 0.097068  |

|     |   |   |            |           |           |
|-----|---|---|------------|-----------|-----------|
| 25  | 1 | 0 | -1.488033  | 6.343677  | -0.906824 |
| 26  | 6 | 0 | 3.716736   | -0.301864 | -0.067459 |
| 27  | 1 | 0 | -4.308728  | 1.064386  | 1.618665  |
| 28  | 6 | 0 | -5.009824  | -0.999035 | -0.039721 |
| 29  | 6 | 0 | -5.129361  | -2.190849 | 0.714847  |
| 30  | 6 | 0 | -6.099628  | -0.544053 | -0.816023 |
| 31  | 6 | 0 | -6.334803  | -2.899675 | 0.674951  |
| 32  | 6 | 0 | -7.284836  | -1.291105 | -0.819222 |
| 33  | 6 | 0 | -7.427690  | -2.469244 | -0.084274 |
| 34  | 1 | 0 | -6.421987  | -3.813759 | 1.256366  |
| 35  | 1 | 0 | -8.125666  | -0.943993 | -1.415075 |
| 36  | 6 | 0 | 4.951075   | -1.090061 | -0.121366 |
| 37  | 6 | 0 | 4.895471   | -2.513394 | -0.354396 |
| 38  | 6 | 0 | 6.232213   | -0.448469 | 0.064383  |
| 39  | 6 | 0 | 6.081705   | -3.226862 | -0.389132 |
| 40  | 6 | 0 | 7.378254   | -1.227971 | 0.008892  |
| 41  | 6 | 0 | 7.340551   | -2.615234 | -0.211336 |
| 42  | 1 | 0 | 6.045779   | -4.291810 | -0.592333 |
| 43  | 1 | 0 | 8.344248   | -0.761514 | 0.173422  |
| 44  | 1 | 0 | 2.794774   | -1.478566 | 1.503347  |
| 45  | 1 | 0 | -2.797168  | -1.295352 | -1.634714 |
| 46  | 6 | 0 | 6.380570   | 1.023916  | 0.438952  |
| 47  | 1 | 0 | 5.392173   | 1.485579  | 0.447598  |
| 48  | 6 | 0 | 3.599145   | -3.251404 | -0.685272 |
| 49  | 1 | 0 | 2.768156   | -2.547760 | -0.615029 |
| 50  | 6 | 0 | 8.617885   | -3.423994 | -0.257525 |
| 51  | 1 | 0 | 9.447743   | -2.730820 | -0.078758 |
| 52  | 6 | 0 | -6.027113  | 0.732261  | -1.653218 |
| 53  | 1 | 0 | -5.028780  | 1.160063  | -1.527238 |
| 54  | 6 | 0 | -3.984824  | -2.725887 | 1.575169  |
| 55  | 1 | 0 | -3.144264  | -2.032503 | 1.484508  |
| 56  | 6 | 0 | -8.734948  | -3.251273 | -0.112947 |
| 57  | 1 | 0 | -9.417913  | -2.708732 | -0.779413 |
| 58  | 6 | 0 | 7.245517   | 1.792657  | -0.578505 |
| 59  | 1 | 0 | 8.274176   | 1.418942  | -0.600885 |
| 60  | 1 | 0 | 6.840109   | 1.716513  | -1.592233 |
| 61  | 1 | 0 | 7.282915   | 2.851921  | -0.306783 |
| 62  | 6 | 0 | 6.942176   | 1.170164  | 1.869737  |
| 63  | 1 | 0 | 6.311419   | 0.652219  | 2.598339  |
| 64  | 1 | 0 | 7.955518   | 0.763305  | 1.947937  |
| 65  | 1 | 0 | 6.982073   | 2.228489  | 2.145059  |
| 66  | 6 | 0 | 3.616839   | -3.759475 | -2.142580 |
| 67  | 1 | 0 | 3.778624   | -2.938113 | -2.846983 |
| 68  | 1 | 0 | 4.406286   | -4.501584 | -2.300228 |
| 69  | 1 | 0 | 2.659136   | -4.231042 | -2.383401 |
| 70  | 6 | 0 | 3.320235   | -4.400919 | 0.301430  |
| 71  | 1 | 0 | 4.089264   | -5.178103 | 0.246755  |
| 72  | 1 | 0 | 3.278801   | -4.044704 | 1.335523  |
| 73  | 1 | 0 | 2.359484   | -4.868247 | 0.064942  |
| 74  | 6 | 0 | 8.829734   | -4.059651 | -1.648579 |
| 75  | 1 | 0 | 9.790330   | -4.583205 | -1.671261 |
| 76  | 1 | 0 | 8.045720   | -4.787472 | -1.880510 |
| 77  | 1 | 0 | 8.834612   | -3.301062 | -2.436509 |
| 78  | 6 | 0 | 8.650469   | -4.494790 | 0.852992  |
| 79  | 1 | 0 | 8.530167   | -4.045448 | 1.842939  |
| 80  | 1 | 0 | 7.858567   | -5.238367 | 0.717807  |
| 81  | 1 | 0 | 9.609929   | -5.020410 | 0.830010  |
| 82  | 6 | 0 | -9.396873  | -3.311363 | 1.276525  |
| 83  | 1 | 0 | -9.568104  | -2.307428 | 1.677525  |
| 84  | 1 | 0 | -10.362472 | -3.825704 | 1.221630  |
| 85  | 1 | 0 | -8.770331  | -3.855347 | 1.991850  |
| 86  | 6 | 0 | -8.547122  | -4.664371 | -0.695954 |
| 87  | 1 | 0 | -8.111780  | -4.624566 | -1.699442 |
| 88  | 1 | 0 | -7.884724  | -5.269329 | -0.067117 |
| 89  | 1 | 0 | -9.508827  | -5.184614 | -0.762212 |
| 90  | 6 | 0 | -3.494580  | -4.100017 | 1.080324  |
| 91  | 1 | 0 | -4.280476  | -4.859162 | 1.157853  |
| 92  | 1 | 0 | -3.177174  | -4.053866 | 0.033613  |
| 93  | 1 | 0 | -2.642645  | -4.440856 | 1.678799  |
| 94  | 6 | 0 | -4.367849  | -2.779332 | 3.066463  |
| 95  | 1 | 0 | -4.676347  | -1.794495 | 3.431360  |
| 96  | 1 | 0 | -5.193614  | -3.476258 | 3.246066  |
| 97  | 1 | 0 | -3.515200  | -3.112282 | 3.668291  |
| 98  | 6 | 0 | -7.037714  | 1.789527  | -1.169109 |
| 99  | 1 | 0 | -8.069958  | 1.440667  | -1.281914 |
| 100 | 1 | 0 | -6.880600  | 2.033400  | -0.113608 |
| 101 | 1 | 0 | -6.932824  | 2.712560  | -1.749530 |



|     |    |   |           |           |           |
|-----|----|---|-----------|-----------|-----------|
| 102 | 6  | 0 | -6.208616 | 0.440641  | -3.155119 |
| 103 | 1  | 0 | -5.464657 | -0.278997 | -3.511567 |
| 104 | 1  | 0 | -7.201197 | 0.029543  | -3.368912 |
| 105 | 1  | 0 | -6.097179 | 1.360835  | -3.738843 |
| 106 | 17 | 0 | 2.192562  | 3.373937  | 1.961175  |
| 107 | 17 | 0 | -2.081739 | 3.748629  | -1.597959 |

TippF<sub>2</sub>PyBTM (D<sub>1</sub> state, UB3LYP/6-31G(d, p))

Standard orientation:

| Center<br>Number | Atomic<br>Number | Atomic<br>Type | Coordinates (Angstroms) |           |           |
|------------------|------------------|----------------|-------------------------|-----------|-----------|
|                  |                  |                | X                       | Y         | Z         |
| 1                | 17               | 0              | 4.684273                | 0.431027  | -2.071261 |
| 2                | 17               | 0              | 1.109128                | -1.102811 | -2.240122 |
| 3                | 17               | 0              | 1.720640                | -1.664291 | 2.111027  |
| 4                | 17               | 0              | 0.699928                | 1.962919  | 2.340536  |
| 5                | 7                | 0              | 4.002125                | 4.623612  | 0.115449  |
| 6                | 6                | 0              | 5.136880                | -1.895308 | -0.847108 |
| 7                | 1                | 0              | 5.958652                | -1.963283 | -1.548491 |
| 8                | 6                | 0              | 3.002604                | -1.710598 | 0.898314  |
| 9                | 6                | 0              | 0.026208                | 1.042476  | 1.010766  |
| 10               | 6                | 0              | 4.694152                | 3.562041  | 0.566490  |
| 11               | 1                | 0              | 5.688292                | 3.736331  | 0.971707  |
| 12               | 6                | 0              | 2.915056                | 1.919205  | 0.067752  |
| 13               | 6                | 0              | -1.349427               | 0.939693  | 0.968552  |
| 14               | 6                | 0              | -1.978107               | 0.114770  | 0.010862  |
| 15               | 6                | 0              | 4.321642                | -0.769035 | -0.832897 |
| 16               | 6                | 0              | 4.202914                | 2.271560  | 0.559907  |
| 17               | 6                | 0              | 0.216331                | -0.357929 | -0.924106 |
| 18               | 6                | 0              | -1.151947               | -0.556902 | -0.922141 |
| 19               | 6                | 0              | 3.774123                | -2.868439 | 0.893480  |
| 20               | 6                | 0              | 0.904033                | 0.429446  | 0.050091  |
| 21               | 6                | 0              | 3.215230                | -0.590499 | 0.048296  |
| 22               | 6                | 0              | 2.239978                | 3.081737  | -0.396233 |
| 23               | 6                | 0              | 2.772752                | 4.355131  | -0.355236 |
| 24               | 6                | 0              | 2.364408                | 0.601604  | 0.061663  |
| 25               | 1                | 0              | 2.179409                | 5.182037  | -0.738640 |
| 26               | 6                | 0              | 4.852202                | -2.944582 | 0.020358  |
| 27               | 1                | 0              | -1.940985               | 1.434642  | 1.729111  |
| 28               | 6                | 0              | -3.434789               | -0.027633 | -0.038091 |
| 29               | 6                | 0              | -4.040766               | -1.338634 | 0.003710  |
| 30               | 6                | 0              | -4.276053               | 1.146059  | -0.135556 |
| 31               | 6                | 0              | -5.419914               | -1.431777 | -0.050139 |
| 32               | 6                | 0              | -5.650471               | 0.972748  | -0.177229 |
| 33               | 6                | 0              | -6.255177               | -0.296143 | -0.139087 |
| 34               | 1                | 0              | -5.881854               | -2.411021 | 0.011924  |
| 35               | 1                | 0              | -6.291636               | 1.842575  | -0.275844 |
| 36               | 1                | 0              | 3.553833                | -3.675552 | 1.580272  |
| 37               | 1                | 0              | -1.599101               | -1.162193 | -1.701331 |
| 38               | 6                | 0              | -3.720446               | 2.555505  | -0.319112 |
| 39               | 1                | 0              | -2.631705               | 2.513466  | -0.269582 |
| 40               | 6                | 0              | -3.237143               | -2.617825 | 0.230338  |
| 41               | 1                | 0              | -2.175132               | -2.367616 | 0.237719  |
| 42               | 6                | 0              | -7.759241               | -0.435496 | -0.189944 |
| 43               | 1                | 0              | -8.177453               | 0.574511  | -0.266010 |
| 44               | 9                | 0              | 0.994532                | 2.935887  | -0.927352 |
| 45               | 9                | 0              | 4.992535                | 1.297420  | 1.079850  |
| 46               | 6                | 0              | -8.307315               | -1.074405 | 1.104932  |
| 47               | 1                | 0              | -8.012496               | -0.500866 | 1.988279  |
| 48               | 1                | 0              | -9.400294               | -1.103388 | 1.064381  |
| 49               | 1                | 0              | -7.949044               | -2.101201 | 1.228890  |
| 50               | 6                | 0              | -8.210632               | -1.228813 | -1.434648 |
| 51               | 1                | 0              | -7.848345               | -0.764072 | -2.356030 |
| 52               | 1                | 0              | -7.847498               | -2.261031 | -1.407311 |
| 53               | 1                | 0              | -9.303636               | -1.259572 | -1.473401 |
| 54               | 6                | 0              | -3.464103               | -3.650405 | -0.889874 |
| 55               | 1                | 0              | -4.501480               | -3.998814 | -0.917900 |
| 56               | 1                | 0              | -3.223501               | -3.237630 | -1.874544 |
| 57               | 1                | 0              | -2.826357               | -4.523626 | -0.722865 |
| 58               | 6                | 0              | -3.551824               | -3.219211 | 1.616601  |
| 59               | 1                | 0              | -3.353698               | -2.499097 | 2.416058  |

|    |    |   |           |           |           |
|----|----|---|-----------|-----------|-----------|
| 60 | 1  | 0 | -4.599362 | -3.528853 | 1.691031  |
| 61 | 1  | 0 | -2.926903 | -4.100667 | 1.789366  |
| 62 | 6  | 0 | -4.201873 | 3.512386  | 0.788637  |
| 63 | 1  | 0 | -5.287894 | 3.647125  | 0.764947  |
| 64 | 1  | 0 | -3.931608 | 3.146688  | 1.784091  |
| 65 | 1  | 0 | -3.742010 | 4.495732  | 0.652248  |
| 66 | 6  | 0 | -4.072631 | 3.102272  | -1.719695 |
| 67 | 1  | 0 | -3.703479 | 2.440065  | -2.508418 |
| 68 | 1  | 0 | -5.153904 | 3.214666  | -1.848540 |
| 69 | 1  | 0 | -3.612937 | 4.085549  | -1.857853 |
| 70 | 17 | 0 | 5.862719  | -4.384369 | 0.006771  |

Tipp2F2PyBTM (D<sub>1</sub> state, UB3LYP/6-31G(d, p))

Standard orientation:

| Center<br>Number | Atomic<br>Number | Atomic<br>Type | Coordinates (Angstroms) |           |           |
|------------------|------------------|----------------|-------------------------|-----------|-----------|
|                  |                  |                | X                       | Y         | Z         |
| 1                | 17               | 0              | 2.132902                | 2.689610  | -2.335519 |
| 2                | 17               | 0              | -0.432015               | -0.220810 | -2.193448 |
| 3                | 17               | 0              | 0.377559                | -0.027040 | 2.155935  |
| 4                | 17               | 0              | -2.108892               | 2.828366  | 2.105773  |
| 5                | 7                | 0              | -0.220262               | 6.405086  | -0.432292 |
| 6                | 6                | 0              | 3.538316                | 0.891754  | -0.936080 |
| 7                | 1                | 0              | 4.298769                | 1.114497  | -1.675949 |
| 8                | 6                | 0              | 1.552913                | 0.347539  | 0.887218  |
| 9                | 6                | 0              | -2.326725               | 1.584862  | 0.891010  |
| 10               | 6                | 0              | 0.856980                | 5.772611  | 0.067604  |
| 11               | 1                | 0              | 1.689483                | 6.380733  | 0.414236  |
| 12               | 6                | 0              | -0.072923               | 3.499966  | -0.223091 |
| 13               | 6                | 0              | -3.528492               | 0.908153  | 0.914036  |
| 14               | 6                | 0              | -3.747009               | -0.198618 | 0.064793  |
| 15               | 6                | 0              | 2.326485                | 1.570616  | -0.982474 |
| 16               | 6                | 0              | 0.953250                | 4.400080  | 0.181738  |
| 17               | 6                | 0              | -1.555544               | 0.205870  | -0.912636 |
| 18               | 6                | 0              | -2.709468               | -0.550025 | -0.834337 |
| 19               | 6                | 0              | 2.744597                | -0.367786 | 0.937771  |
| 20               | 6                | 0              | -1.267161               | 1.307583  | -0.046194 |
| 21               | 6                | 0              | 1.258988                | 1.357898  | -0.065912 |
| 22               | 6                | 0              | -1.176875               | 4.230019  | -0.745325 |
| 23               | 6                | 0              | -1.227407               | 5.607517  | -0.825840 |
| 24               | 6                | 0              | -0.019670               | 2.078548  | -0.109383 |
| 25               | 1                | 0              | -2.116066               | 6.073840  | -1.245053 |
| 26               | 6                | 0              | 3.771006                | -0.096877 | 0.027594  |
| 27               | 1                | 0              | -4.275616               | 1.180759  | 1.649464  |
| 28               | 6                | 0              | -5.005867               | -0.945847 | 0.087458  |
| 29               | 6                | 0              | -4.999424               | -2.378067 | 0.274080  |
| 30               | 6                | 0              | -6.264210               | -0.254789 | -0.084526 |
| 31               | 6                | 0              | -6.208622               | -3.051413 | 0.280238  |
| 32               | 6                | 0              | -7.435445               | -0.996663 | -0.059066 |
| 33               | 6                | 0              | -7.445428               | -2.391089 | 0.118328  |
| 34               | 1                | 0              | -6.210642               | -4.122688 | 0.450132  |
| 35               | 1                | 0              | -8.384530               | -0.493508 | -0.213249 |
| 36               | 6                | 0              | 5.073729                | -0.840031 | 0.079170  |
| 37               | 6                | 0              | 5.227467                | -2.052869 | -0.634401 |
| 38               | 6                | 0              | 6.149432                | -0.328733 | 0.839899  |
| 39               | 6                | 0              | 6.452226                | -2.726008 | -0.570026 |
| 40               | 6                | 0              | 7.354786                | -1.042177 | 0.869882  |
| 41               | 6                | 0              | 7.531347                | -2.240150 | 0.175361  |
| 42               | 1                | 0              | 6.565749                | -3.656641 | -1.119864 |
| 43               | 1                | 0              | 8.184751                | -0.651870 | 1.454166  |
| 44               | 1                | 0              | 2.883465                | -1.118249 | 1.707590  |
| 45               | 1                | 0              | -2.856563               | -1.362896 | -1.535200 |
| 46               | 6                | 0              | 6.039942                | 0.973800  | 1.631554  |
| 47               | 1                | 0              | 5.033535                | 1.373919  | 1.481537  |
| 48               | 6                | 0              | 4.098384                | -2.649264 | -1.474499 |
| 49               | 1                | 0              | 3.238228                | -1.977841 | -1.404961 |
| 50               | 6                | 0              | 8.859429                | -2.984668 | 0.232270  |
| 51               | 1                | 0              | 9.526659                | -2.400014 | 0.878774  |
| 52               | 6                | 0              | -6.359937               | 1.232467  | -0.414941 |
| 53               | 1                | 0              | -5.355830               | 1.658544  | -0.411072 |
| 54               | 6                | 0              | -3.730389               | -3.166302 | 0.593403  |

|     |   |   |           |           |           |
|-----|---|---|-----------|-----------|-----------|
| 55  | 1 | 0 | -2.874253 | -2.492806 | 0.528401  |
| 56  | 6 | 0 | -8.749127 | -3.157061 | 0.135933  |
| 57  | 1 | 0 | -9.555365 | -2.429853 | -0.012672 |
| 58  | 9 | 0 | -2.249703 | 3.530925  | -1.209055 |
| 59  | 9 | 0 | 2.083235  | 3.896247  | 0.740452  |
| 60  | 6 | 0 | 7.031046  | 2.036996  | 1.120932  |
| 61  | 1 | 0 | 8.069976  | 1.717433  | 1.256892  |
| 62  | 1 | 0 | 6.880144  | 2.239832  | 0.055870  |
| 63  | 1 | 0 | 6.897824  | 2.977074  | 1.667205  |
| 64  | 6 | 0 | 6.213135  | 0.737655  | 3.144112  |
| 65  | 1 | 0 | 5.481364  | 0.014566  | 3.518358  |
| 66  | 1 | 0 | 7.212211  | 0.355470  | 3.380283  |
| 67  | 1 | 0 | 6.076469  | 1.674469  | 3.695140  |
| 68  | 6 | 0 | 4.481399  | -2.741088 | -2.963900 |
| 69  | 1 | 0 | 4.760316  | -1.760276 | -3.361999 |
| 70  | 1 | 0 | 5.327307  | -3.418889 | -3.121738 |
| 71  | 1 | 0 | 3.638473  | -3.118966 | -3.552776 |
| 72  | 6 | 0 | 3.648729  | -4.019871 | -0.933426 |
| 73  | 1 | 0 | 4.456010  | -4.758322 | -0.987741 |
| 74  | 1 | 0 | 3.331625  | -3.948208 | 0.111940  |
| 75  | 1 | 0 | 2.806054  | -4.404664 | -1.518238 |
| 76  | 6 | 0 | 9.524478  | -3.077194 | -1.153884 |
| 77  | 1 | 0 | 10.503864 | -3.562263 | -1.079954 |
| 78  | 1 | 0 | 8.914203  | -3.664181 | -1.848990 |
| 79  | 1 | 0 | 9.668367  | -2.084250 | -1.591346 |
| 80  | 6 | 0 | 8.709114  | -4.380276 | 0.866097  |
| 81  | 1 | 0 | 8.271861  | -4.315796 | 1.867474  |
| 82  | 1 | 0 | 8.063630  | -5.024994 | 0.259577  |
| 83  | 1 | 0 | 9.684294  | -4.871936 | 0.951163  |
| 84  | 6 | 0 | -8.981013 | -3.841459 | 1.500418  |
| 85  | 1 | 0 | -8.960426 | -3.115704 | 2.318430  |
| 86  | 1 | 0 | -9.958580 | -4.332994 | 1.503183  |
| 87  | 1 | 0 | -8.221993 | -4.604048 | 1.701614  |
| 88  | 6 | 0 | -8.817948 | -4.179779 | -1.017804 |
| 89  | 1 | 0 | -8.685595 | -3.693892 | -1.988741 |
| 90  | 1 | 0 | -8.049743 | -4.952940 | -0.916184 |
| 91  | 1 | 0 | -9.793741 | -4.674844 | -1.012898 |
| 92  | 6 | 0 | -3.493516 | -4.316363 | -0.403204 |
| 93  | 1 | 0 | -4.286502 | -5.069298 | -0.352399 |
| 94  | 1 | 0 | -3.443211 | -3.952988 | -1.434383 |
| 95  | 1 | 0 | -2.547809 | -4.816433 | -0.173350 |
| 96  | 6 | 0 | -3.765568 | -3.684789 | 2.046975  |
| 97  | 1 | 0 | -3.892112 | -2.863133 | 2.758225  |
| 98  | 1 | 0 | -4.585307 | -4.394423 | 2.199653  |
| 99  | 1 | 0 | -2.827663 | -4.197285 | 2.281833  |
| 100 | 6 | 0 | -7.196752 | 1.999831  | 0.626955  |
| 101 | 1 | 0 | -8.237514 | 1.660672  | 0.640396  |
| 102 | 1 | 0 | -6.792996 | 1.880231  | 1.637128  |
| 103 | 1 | 0 | -7.198192 | 3.067275  | 0.386595  |
| 104 | 6 | 0 | -6.917228 | 1.441783  | -1.839528 |
| 105 | 1 | 0 | -6.306397 | 0.923398  | -2.584572 |
| 106 | 1 | 0 | -7.945059 | 1.075662  | -1.928516 |
| 107 | 1 | 0 | -6.917903 | 2.508685  | -2.082680 |

Ph\*F<sub>2</sub>PyBTM (D<sub>1</sub> state, UB3LYP/6-31G(d, p))

Standard orientation:

| Center Number | Atomic Number | Atomic Type | Coordinates (Angstroms) |           |           |
|---------------|---------------|-------------|-------------------------|-----------|-----------|
|               |               |             | X                       | Y         | Z         |
| 1             | 17            | 0           | 0.093604                | 1.861472  | 2.400040  |
| 2             | 17            | 0           | 1.314757                | -1.817365 | 2.026554  |
| 3             | 17            | 0           | 0.636277                | -1.058858 | -2.284011 |
| 4             | 17            | 0           | 4.128231                | 0.641951  | -2.067748 |
| 5             | 7             | 0           | 3.542110                | 4.588030  | 0.563021  |
| 6             | 6             | 0           | -1.894499               | 0.801012  | 0.966036  |
| 7             | 1             | 0           | -2.506620               | 1.258188  | 1.735266  |
| 8             | 6             | 0           | -0.274130               | -0.356541 | -0.940814 |
| 9             | 6             | 0           | 3.803550                | -0.664905 | -0.927236 |
| 10            | 6             | 0           | 2.319771                | 4.380400  | 0.042152  |
| 11            | 1             | 0           | 1.749742                | 5.248341  | -0.282495 |
| 12            | 6             | 0           | 2.399018                | 1.911923  | 0.251885  |

|    |    |   |           |           |           |
|----|----|---|-----------|-----------|-----------|
| 13 | 6  | 0 | 4.638995  | -1.770325 | -1.047260 |
| 14 | 6  | 0 | 4.390486  | -2.885457 | -0.255246 |
| 15 | 6  | 0 | -0.514856 | 0.965779  | 1.005476  |
| 16 | 6  | 0 | 1.761170  | 3.128735  | -0.121707 |
| 17 | 6  | 0 | 2.546238  | -1.748949 | 0.759132  |
| 18 | 6  | 0 | 3.337225  | -2.889950 | 0.650110  |
| 19 | 6  | 0 | -1.648914 | -0.567221 | -0.987317 |
| 20 | 6  | 0 | 2.712007  | -0.569768 | -0.017377 |
| 21 | 6  | 0 | 0.389870  | 0.415098  | 0.052764  |
| 22 | 6  | 0 | 3.681711  | 2.200912  | 0.798586  |
| 23 | 6  | 0 | 4.200614  | 3.473124  | 0.929035  |
| 24 | 6  | 0 | 1.842137  | 0.607067  | 0.098138  |
| 25 | 1  | 0 | 5.189823  | 3.586301  | 1.367374  |
| 26 | 6  | 0 | -2.481500 | 0.022130  | -0.033635 |
| 27 | 1  | 0 | 5.446892  | -1.769036 | -1.767772 |
| 28 | 6  | 0 | -3.967398 | -0.170920 | -0.077450 |
| 29 | 6  | 0 | -4.566586 | -1.233790 | 0.613668  |
| 30 | 6  | 0 | -4.776193 | 0.710643  | -0.810030 |
| 31 | 6  | 0 | -6.017155 | -1.413982 | 0.575264  |
| 32 | 6  | 0 | -6.225672 | 0.521274  | -0.850096 |
| 33 | 6  | 0 | -6.818645 | -0.583221 | -0.221595 |
| 34 | 1  | 0 | -2.068442 | -1.164566 | -1.788887 |
| 35 | 1  | 0 | 3.151698  | -3.746817 | 1.284947  |
| 36 | 6  | 0 | -4.183161 | 1.852618  | -1.571817 |
| 37 | 1  | 0 | -4.441259 | 2.802505  | -1.084958 |
| 38 | 1  | 0 | -3.099727 | 1.785732  | -1.622080 |
| 39 | 1  | 0 | -4.588561 | 1.902907  | -2.586909 |
| 40 | 6  | 0 | -3.745009 | -2.209579 | 1.394328  |
| 41 | 1  | 0 | -2.683416 | -2.096087 | 1.191446  |
| 42 | 1  | 0 | -3.902016 | -2.056171 | 2.470348  |
| 43 | 1  | 0 | -4.044803 | -3.239565 | 1.179216  |
| 44 | 6  | 0 | -8.301262 | -0.846390 | -0.362684 |
| 45 | 1  | 0 | -8.523977 | -1.910179 | -0.278089 |
| 46 | 1  | 0 | -8.879116 | -0.322060 | 0.407465  |
| 47 | 1  | 0 | -8.669308 | -0.517283 | -1.334830 |
| 48 | 9  | 0 | 4.449904  | 1.168832  | 1.244614  |
| 49 | 9  | 0 | 0.527296  | 3.071517  | -0.697769 |
| 50 | 6  | 0 | -7.067426 | 1.524225  | -1.577835 |
| 51 | 1  | 0 | -6.627303 | 2.520509  | -1.560718 |
| 52 | 1  | 0 | -7.165166 | 1.232855  | -2.633473 |
| 53 | 1  | 0 | -8.073305 | 1.583162  | -1.163662 |
| 54 | 6  | 0 | -6.634553 | -2.505213 | 1.395189  |
| 55 | 1  | 0 | -6.691505 | -3.429633 | 0.802756  |
| 56 | 1  | 0 | -6.051874 | -2.731053 | 2.287157  |
| 57 | 1  | 0 | -7.650137 | -2.253771 | 1.699689  |
| 58 | 17 | 0 | 5.421472  | -4.306965 | -0.402042 |

Ph\*<sub>2</sub>F<sub>2</sub>PyBTM (D<sub>0</sub> state, UB3LYP/6-31G(d, p))

Standard orientation:

| Center Number | Atomic Number | Atomic Type | Coordinates (Angstroms) |           |           |
|---------------|---------------|-------------|-------------------------|-----------|-----------|
|               |               |             | X                       | Y         | Z         |
| 1             | 17            | 0           | -2.130558               | 2.429030  | 2.240853  |
| 2             | 17            | 0           | 0.407881                | -0.478935 | 2.163743  |
| 3             | 17            | 0           | -0.433791               | -0.409614 | -2.208296 |
| 4             | 17            | 0           | 2.149829                | 2.510966  | -2.175269 |
| 5             | 7             | 0           | -0.049587               | 6.134619  | 0.004805  |
| 6             | 6             | 0           | -3.523677               | 0.540615  | 0.950063  |
| 7             | 1             | 0           | -4.273122               | 0.777625  | 1.696828  |
| 8             | 6             | 0           | -1.568394               | -0.019734 | -0.901501 |
| 9             | 6             | 0           | 2.327472                | 1.298049  | -0.903517 |
| 10            | 6             | 0           | -1.078118               | 5.399644  | -0.457813 |
| 11            | 1             | 0           | -1.943375               | 5.927220  | -0.853671 |
| 12            | 6             | 0           | -0.018644               | 3.204833  | -0.001892 |
| 13            | 6             | 0           | 3.532273                | 0.605235  | -0.916095 |
| 14            | 6             | 0           | 3.746982                | -0.450222 | -0.026894 |
| 15            | 6             | 0           | -2.323609               | 1.242420  | 0.941501  |
| 16            | 6             | 0           | -1.086507               | 4.020034  | -0.477762 |
| 17            | 6             | 0           | 1.546619                | -0.038666 | 0.884095  |
| 18            | 6             | 0           | 2.728927                | -0.772053 | 0.873345  |
| 19            | 6             | 0           | -2.747419               | -0.759905 | -0.899557 |

|    |   |   |           |           |           |
|----|---|---|-----------|-----------|-----------|
| 20 | 6 | 0 | 1.256112  | 1.039403  | 0.001108  |
| 21 | 6 | 0 | -1.269202 | 1.022305  | 0.014134  |
| 22 | 6 | 0 | 1.029833  | 4.041161  | 0.479345  |
| 23 | 6 | 0 | 0.993417  | 5.420486  | 0.465216  |
| 24 | 6 | 0 | -0.006412 | 1.779995  | 0.006217  |
| 25 | 1 | 0 | 1.847279  | 5.964531  | 0.863754  |
| 26 | 6 | 0 | -3.756911 | -0.484695 | 0.027445  |
| 27 | 1 | 0 | 4.290697  | 0.871693  | -1.643615 |
| 28 | 6 | 0 | 5.037257  | -1.212646 | -0.041224 |
| 29 | 6 | 0 | 5.174306  | -2.365589 | -0.827013 |
| 30 | 6 | 0 | 6.124174  | -0.781377 | 0.734527  |
| 31 | 6 | 0 | 6.435136  | -3.106258 | -0.835355 |
| 32 | 6 | 0 | 7.384297  | -1.522845 | 0.717606  |
| 33 | 6 | 0 | 7.496891  | -2.719684 | -0.003374 |
| 34 | 6 | 0 | -5.045238 | -1.255797 | 0.031851  |
| 35 | 6 | 0 | -5.147186 | -2.444074 | 0.786335  |
| 36 | 6 | 0 | -6.146283 | -0.776815 | -0.709811 |
| 37 | 6 | 0 | -6.358619 | -3.164194 | 0.785493  |
| 38 | 6 | 0 | -7.354570 | -1.502096 | -0.703308 |
| 39 | 6 | 0 | -7.448901 | -2.707576 | 0.019301  |
| 40 | 1 | 0 | -2.890726 | -1.534780 | -1.644196 |
| 41 | 1 | 0 | 2.863989  | -1.572443 | 1.592077  |
| 42 | 6 | 0 | -6.036853 | 0.502119  | -1.518229 |
| 43 | 1 | 0 | -6.692790 | 1.287295  | -1.122855 |
| 44 | 1 | 0 | -5.021561 | 0.896372  | -1.515080 |
| 45 | 1 | 0 | -6.327729 | 0.342221  | -2.562090 |
| 46 | 6 | 0 | -3.966541 | -2.951872 | 1.592173  |
| 47 | 1 | 0 | -3.076109 | -2.346490 | 1.428033  |
| 48 | 1 | 0 | -4.177100 | -2.938012 | 2.668493  |
| 49 | 1 | 0 | -3.717348 | -3.986308 | 1.331396  |
| 50 | 6 | 0 | -8.731409 | -3.515341 | -0.025153 |
| 51 | 1 | 0 | -8.542001 | -4.582946 | 0.101630  |
| 52 | 1 | 0 | -9.430136 | -3.216629 | 0.768478  |
| 53 | 1 | 0 | -9.255198 | -3.390522 | -0.974835 |
| 54 | 6 | 0 | 6.021777  | 0.433589  | 1.600008  |
| 55 | 1 | 0 | 6.613526  | 1.251828  | 1.168017  |
| 56 | 1 | 0 | 4.994984  | 0.777177  | 1.693119  |
| 57 | 1 | 0 | 6.432031  | 0.245414  | 2.596455  |
| 58 | 6 | 0 | 4.042183  | -2.870491 | -1.663802 |
| 59 | 1 | 0 | 3.114598  | -2.348734 | -1.444534 |
| 60 | 1 | 0 | 4.269092  | -2.726568 | -2.728412 |
| 61 | 1 | 0 | 3.893228  | -3.944997 | -1.519496 |
| 62 | 6 | 0 | 8.754342  | -3.555900 | 0.077987  |
| 63 | 1 | 0 | 8.536080  | -4.612752 | -0.077036 |
| 64 | 1 | 0 | 9.489817  | -3.253552 | -0.676670 |
| 65 | 1 | 0 | 9.226175  | -3.465163 | 1.056639  |
| 66 | 9 | 0 | 2.140780  | 3.456387  | 1.011822  |
| 67 | 9 | 0 | -2.184981 | 3.415631  | -1.010704 |
| 68 | 6 | 0 | -8.559341 | -0.994719 | -1.472272 |
| 69 | 1 | 0 | -8.468714 | 0.060916  | -1.727606 |
| 70 | 1 | 0 | -8.703176 | -1.542917 | -2.413099 |
| 71 | 1 | 0 | -9.480721 | -1.110479 | -0.894317 |
| 72 | 6 | 0 | -6.500241 | -4.432082 | 1.605710  |
| 73 | 1 | 0 | -6.442399 | -5.331820 | 0.978472  |
| 74 | 1 | 0 | -5.722546 | -4.520128 | 2.364076  |
| 75 | 1 | 0 | -7.463251 | -4.468627 | 2.123261  |
| 76 | 6 | 0 | 6.578012  | -4.290815 | -1.741222 |
| 77 | 1 | 0 | 6.290237  | -5.205895 | -1.203969 |
| 78 | 1 | 0 | 5.940421  | -4.220162 | -2.620894 |
| 79 | 1 | 0 | 7.608977  | -4.421636 | -2.069937 |
| 80 | 6 | 0 | 8.550287  | -0.983758 | 1.488717  |
| 81 | 1 | 0 | 8.541934  | 0.104840  | 1.535576  |
| 82 | 1 | 0 | 8.515444  | -1.350804 | 2.524413  |
| 83 | 1 | 0 | 9.499927  | -1.303953 | 1.062064  |

Xyl<sub>2</sub>F<sub>2</sub>PyBTM (D<sub>1</sub> state, UB3LYP/6-31G(d, p))

Standard orientation:

| Center<br>Number | Atomic<br>Number | Atomic<br>Type | Coordinates (Angstroms) |          |          |
|------------------|------------------|----------------|-------------------------|----------|----------|
|                  |                  |                | X                       | Y        | Z        |
| 1                | 17               | 0              | -2.233422               | 2.152381 | 2.113132 |

|    |    |   |           |           |           |
|----|----|---|-----------|-----------|-----------|
| 2  | 17 | 0 | 0.445789  | -0.719640 | 2.224777  |
| 3  | 17 | 0 | -0.259437 | -0.867175 | -2.086637 |
| 4  | 17 | 0 | 2.130974  | 2.142670  | -2.194593 |
| 5  | 7  | 0 | 0.088178  | 5.768827  | 0.096054  |
| 6  | 6  | 0 | -3.551903 | 0.233391  | 0.799193  |
| 7  | 1  | 0 | -4.326416 | 0.485596  | 1.512560  |
| 8  | 6  | 0 | -1.486422 | -0.419864 | -0.894066 |
| 9  | 6  | 0 | 2.353173  | 0.963140  | -0.915927 |
| 10 | 6  | 0 | -0.946548 | 5.085115  | -0.422926 |
| 11 | 1  | 0 | -1.772964 | 5.652614  | -0.844524 |
| 12 | 6  | 0 | 0.019920  | 2.860675  | 0.042961  |
| 13 | 6  | 0 | 3.561316  | 0.304962  | -0.890617 |
| 14 | 6  | 0 | 3.797111  | -0.761259 | 0.016906  |
| 15 | 6  | 0 | -2.358616 | 0.940248  | 0.834107  |
| 16 | 6  | 0 | -1.004224 | 3.705243  | -0.464681 |
| 17 | 6  | 0 | 1.584095  | -0.345864 | 0.941608  |
| 18 | 6  | 0 | 2.756702  | -1.070687 | 0.930806  |
| 19 | 6  | 0 | -2.658656 | -1.161987 | -0.927414 |
| 20 | 6  | 0 | 1.279193  | 0.699709  | 0.006559  |
| 21 | 6  | 0 | -1.248798 | 0.677593  | -0.020491 |
| 22 | 6  | 0 | 1.078011  | 3.641579  | 0.579048  |
| 23 | 6  | 0 | 1.092199  | 5.023062  | 0.585870  |
| 24 | 6  | 0 | 0.006571  | 1.428883  | 0.004735  |
| 25 | 1  | 0 | 1.945601  | 5.536117  | 1.023015  |
| 26 | 6  | 0 | -3.733863 | -0.839136 | -0.087142 |
| 27 | 1  | 0 | 4.305400  | 0.553783  | -1.636692 |
| 28 | 6  | 0 | 5.076018  | -1.450593 | 0.019642  |
| 29 | 6  | 0 | 5.233717  | -2.856165 | 0.307700  |
| 30 | 6  | 0 | 6.247484  | -0.692105 | -0.285354 |
| 31 | 6  | 0 | 6.519395  | -3.386757 | 0.318950  |
| 32 | 6  | 0 | 7.502561  | -1.250192 | -0.252398 |
| 33 | 6  | 0 | 7.669137  | -2.622653 | 0.059036  |
| 34 | 1  | 0 | 6.638589  | -4.448178 | 0.515330  |
| 35 | 1  | 0 | 8.374820  | -0.636823 | -0.454715 |
| 36 | 6  | 0 | -4.979970 | -1.648150 | -0.113749 |
| 37 | 6  | 0 | -4.865216 | -3.050761 | -0.103168 |
| 38 | 6  | 0 | -6.274362 | -1.076913 | -0.171131 |
| 39 | 6  | 0 | -5.982467 | -3.877538 | -0.127799 |
| 40 | 6  | 0 | -7.382530 | -1.933840 | -0.199059 |
| 41 | 6  | 0 | -7.270424 | -3.327938 | -0.169431 |
| 42 | 1  | 0 | -5.853962 | -4.956730 | -0.111467 |
| 43 | 1  | 0 | -8.374283 | -1.490731 | -0.260226 |
| 44 | 1  | 0 | -2.754856 | -1.967179 | -1.646322 |
| 45 | 1  | 0 | 2.908768  | -1.818272 | 1.695927  |
| 46 | 6  | 0 | -6.514423 | 0.415504  | -0.244491 |
| 47 | 1  | 0 | -6.541167 | 0.875734  | 0.750400  |
| 48 | 1  | 0 | -5.735996 | 0.928711  | -0.814579 |
| 49 | 1  | 0 | -7.478322 | 0.621994  | -0.717625 |
| 50 | 6  | 0 | -8.495810 | -4.209632 | -0.167053 |
| 51 | 1  | 0 | -8.332378 | -5.122594 | -0.747940 |
| 52 | 1  | 0 | -8.756847 | -4.519202 | 0.852712  |
| 53 | 1  | 0 | -9.363900 | -3.690142 | -0.582304 |
| 54 | 6  | 0 | 4.075278  | -3.799371 | 0.520733  |
| 55 | 1  | 0 | 3.762364  | -3.825468 | 1.571268  |
| 56 | 1  | 0 | 3.203720  | -3.528507 | -0.077967 |
| 57 | 1  | 0 | 4.371656  | -4.816602 | 0.254911  |
| 58 | 6  | 0 | 9.037168  | -3.232820 | 0.089295  |
| 59 | 1  | 0 | 9.004441  | -4.297566 | 0.326483  |
| 60 | 1  | 0 | 9.538671  | -3.104839 | -0.877333 |
| 61 | 1  | 0 | 9.664865  | -2.728942 | 0.834129  |
| 62 | 9  | 0 | 2.139846  | 2.994816  | 1.130910  |
| 63 | 9  | 0 | -2.089923 | 3.140034  | -1.048512 |
| 64 | 1  | 0 | 6.145467  | 0.367113  | -0.489321 |
| 65 | 1  | 0 | -3.875092 | -3.494631 | -0.054722 |

Biph<sub>2</sub>F<sub>2</sub>PyBTM (D<sub>0</sub> state, UB3LYP/6-31G(d, p))

Standard orientation:

| Center<br>Number | Atomic<br>Number | Atomic<br>Type | Coordinates (Angstroms) |           |           |
|------------------|------------------|----------------|-------------------------|-----------|-----------|
|                  |                  |                | X                       | Y         | Z         |
| 1                | 17               | 0              | -2.252355               | -1.594054 | -2.246876 |

|    |    |   |           |           |           |
|----|----|---|-----------|-----------|-----------|
| 2  | 17 | 0 | 1.018834  | 0.549955  | -2.157840 |
| 3  | 17 | 0 | 0.255778  | 0.605190  | 2.174626  |
| 4  | 17 | 0 | 1.877901  | -2.882041 | 2.096816  |
| 5  | 7  | 0 | -1.019570 | -5.774097 | -0.300007 |
| 6  | 6  | 0 | -3.097146 | 0.525141  | -0.852215 |
| 7  | 1  | 0 | -3.898803 | 0.505887  | -1.579956 |
| 8  | 6  | 0 | -0.992243 | 0.547130  | 0.920401  |
| 9  | 6  | 0 | 2.404277  | -1.738921 | 0.877316  |
| 10 | 6  | 0 | -1.853880 | -4.857644 | 0.222352  |
| 11 | 1  | 0 | -2.811917 | -5.200518 | 0.606345  |
| 12 | 6  | 0 | -0.327506 | -2.948068 | -0.142862 |
| 13 | 6  | 0 | 3.744237  | -1.406027 | 0.893293  |
| 14 | 6  | 0 | 4.239120  | -0.393734 | 0.050224  |
| 15 | 6  | 0 | -2.113872 | -0.450993 | -0.906521 |
| 16 | 6  | 0 | -1.550234 | -3.513229 | 0.313658  |
| 17 | 6  | 0 | 1.995210  | -0.185303 | -0.890945 |
| 18 | 6  | 0 | 3.323052  | 0.209150  | -0.852343 |
| 19 | 6  | 0 | -1.945926 | 1.556475  | 0.976576  |
| 20 | 6  | 0 | 1.434919  | -1.167575 | -0.029492 |
| 21 | 6  | 0 | -1.003781 | -0.520370 | -0.016342 |
| 22 | 6  | 0 | 0.504448  | -3.964811 | -0.685567 |
| 23 | 6  | 0 | 0.157265  | -5.300785 | -0.742029 |
| 24 | 6  | 0 | 0.025313  | -1.563849 | -0.063454 |
| 25 | 1  | 0 | 0.860323  | -6.005140 | -1.180747 |
| 26 | 6  | 0 | -3.035077 | 1.555957  | 0.096971  |
| 27 | 1  | 0 | 4.394104  | -1.871780 | 1.624138  |
| 28 | 6  | 0 | 5.650278  | -0.012967 | 0.065167  |
| 29 | 6  | 0 | 6.081909  | 1.348573  | -0.134722 |
| 30 | 6  | 0 | 6.631388  | -1.016303 | 0.207157  |
| 31 | 6  | 0 | 7.459880  | 1.604935  | -0.301673 |
| 32 | 6  | 0 | 7.979034  | -0.725342 | 0.081464  |
| 33 | 6  | 0 | 8.397140  | 0.592897  | -0.188710 |
| 34 | 1  | 0 | 7.790976  | 2.626988  | -0.447045 |
| 35 | 1  | 0 | 8.712828  | -1.520155 | 0.163741  |
| 36 | 6  | 0 | -4.041902 | 2.651332  | 0.136685  |
| 37 | 6  | 0 | -3.572170 | 3.976399  | 0.168733  |
| 38 | 6  | 0 | -5.442127 | 2.424860  | 0.104535  |
| 39 | 6  | 0 | -4.441959 | 5.063789  | 0.150409  |
| 40 | 6  | 0 | -6.302130 | 3.535811  | 0.071943  |
| 41 | 6  | 0 | -5.817900 | 4.841906  | 0.092440  |
| 42 | 1  | 0 | -4.046297 | 6.074784  | 0.168617  |
| 43 | 1  | 0 | -7.373909 | 3.361943  | 0.062443  |
| 44 | 1  | 0 | -1.865621 | 2.319016  | 1.742573  |
| 45 | 1  | 0 | 3.677914  | 0.920554  | -1.586170 |
| 46 | 9  | 0 | 1.714071  | -3.606788 | -1.194640 |
| 47 | 9  | 0 | -2.469145 | -2.703397 | 0.897909  |
| 48 | 1  | 0 | 6.316081  | -2.043962 | 0.348154  |
| 49 | 1  | 0 | -2.500069 | 4.148542  | 0.174551  |
| 50 | 1  | 0 | 9.453638  | 0.818648  | -0.285361 |
| 51 | 1  | 0 | -6.511098 | 5.677466  | 0.074100  |
| 52 | 6  | 0 | -6.058017 | 1.066466  | 0.151734  |
| 53 | 6  | 0 | -7.054085 | 0.709187  | -0.772325 |
| 54 | 6  | 0 | -5.708335 | 0.138545  | 1.147643  |
| 55 | 6  | 0 | -7.674447 | -0.539425 | -0.710022 |
| 56 | 1  | 0 | -7.331588 | 1.410962  | -1.553567 |
| 57 | 6  | 0 | -6.330588 | -1.107169 | 1.212300  |
| 58 | 1  | 0 | -4.950534 | 0.399914  | 1.879099  |
| 59 | 6  | 0 | -7.314818 | -1.452504 | 0.282685  |
| 60 | 1  | 0 | -8.435632 | -0.798824 | -1.440118 |
| 61 | 1  | 0 | -6.047707 | -1.808316 | 1.991953  |
| 62 | 1  | 0 | -7.796123 | -2.424683 | 0.332069  |
| 63 | 6  | 0 | 5.157819  | 2.486390  | -0.081163 |
| 64 | 6  | 0 | 5.336896  | 3.596980  | -0.941291 |
| 65 | 6  | 0 | 4.107240  | 2.539587  | 0.877839  |
| 66 | 6  | 0 | 4.486603  | 4.688394  | -0.869806 |
| 67 | 1  | 0 | 6.118505  | 3.570527  | -1.692470 |
| 68 | 6  | 0 | 3.273123  | 3.648851  | 0.957141  |
| 69 | 1  | 0 | 3.992507  | 1.730143  | 1.587894  |
| 70 | 6  | 0 | 3.452266  | 4.721654  | 0.082444  |
| 71 | 1  | 0 | 4.615760  | 5.518603  | -1.556069 |
| 72 | 1  | 0 | 2.488610  | 3.677966  | 1.705305  |
| 73 | 1  | 0 | 2.798399  | 5.585601  | 0.139015  |

---

## Results of TD-DFT calculations in dichloromethane

### TippPyBTM (Optimized ground state structure, UB3LYP/6-31G(d, p))

Excitation energies and oscillator strengths:

```
Excited State 1: 2.059-A      2.4901 eV  497.91 nm  f=0.0003  <S**2>=0.810
 174B ->177B      -0.23212
 175B ->177B      -0.14021
 176B ->177B       0.95895
```

This state for optimization and/or second-order correction.

Total Energy, E(TD-HF/TD-DFT) = -4551.03043382

Copying the excited state density for this state as the 1-particle RhoCI density.

```
Excited State 2: 2.073-A      2.5254 eV  490.96 nm  f=0.0050  <S**2>=0.824
 173B ->177B       0.27771
 174B ->177B      -0.27667
 175B ->177B       0.90082
```

```
Excited State 3: 2.132-A      2.5584 eV  484.61 nm  f=0.0388  <S**2>=0.886
 177A ->179A       0.17102
 171B ->177B       0.15267
 172B ->177B       0.15574
 173B ->177B       0.75021
 174B ->177B      -0.38335
 175B ->177B      -0.39601
 176B ->177B      -0.11938
```

### Tipp<sub>2</sub>PyBTM (Optimized ground state structure, UB3LYP/6-31G(d, p))

Excitation energies and oscillator strengths:

```
Excited State 1: 2.124-A      2.5509 eV  486.04 nm  f=0.0388  <S**2>=0.878
 225A -> 227A      -0.15909
 217B -> 225B      -0.19443
 218B -> 225B       0.41992
 219B -> 225B       0.70405
 222B -> 225B      -0.46962
```

This state for optimization and/or second-order correction.

Total Energy, E(TD-HF/TD-DFT) = -4676.35012023

Copying the excited state density for this state as the 1-particle RhoCI density.

```
Excited State 2: 2.064-A      2.5633 eV  483.69 nm  f=0.0000  <S**2>=0.815
 220B -> 225B      -0.35186
 221B -> 225B      -0.13762
 223B -> 225B       0.60393
 224B -> 225B       0.69312
```

```
Excited State 3: 2.060-A      2.5692 eV  482.58 nm  f=0.0007  <S**2>=0.811
 218B -> 225B       0.15402
 219B -> 225B      -0.14117
 222B -> 225B      -0.20010
 223B -> 225B       0.71901
 224B -> 225B      -0.62649
```

### TippF<sub>2</sub>PyBTM (Optimized ground state structure, UB3LYP/6-31G(d, p))

Excitation energies and oscillator strengths:

```
Excited State 1: 2.058-A      2.5288 eV  490.29 nm  f=0.0004  <S**2>=0.809
 166B ->169B      -0.25734
 167B ->169B      -0.16973
 168B ->169B       0.94474
```

This state for optimization and/or second-order correction.

Total Energy, E(TD-HF/TD-DFT) = -3830.31293209

Copying the excited state density for this state as the 1-particle RhoCI density.

```
Excited State 2: 2.060-A      2.5718 eV  482.10 nm  f=0.0012  <S**2>=0.810
 165B ->169B      -0.15561
 166B ->169B      -0.11538
 167B ->169B       0.96233
 168B ->169B       0.15723
```



Excited State 3: 2.143-A 2.6280 eV 471.77 nm f=0.0295 <S\*\*2>=0.898  
169A ->171A 0.15373  
165B ->169B 0.87121  
166B ->169B -0.33425  
167B ->169B 0.14452  
168B ->169B -0.14470

#### Tipp<sub>2</sub>F<sub>2</sub>PyBTM (Optimized ground state structure, UB3LYP/6-31G(d, p))

Excitation energies and oscillator strengths:

Excited State 1: 2.065-A 2.5938 eV 478.00 nm f=0.0003 <S\*\*2>=0.816  
212B -> 217B -0.44128  
216B -> 217B 0.88003

This state for optimization and/or second-order correction.

Total Energy, E(TD-HF/TD-DFT) = -3955.63246159

Copying the excited state density for this state as the 1-particle RhoCI density.

Excited State 2: 2.063-A 2.6050 eV 475.95 nm f=0.0018 <S\*\*2>=0.814  
210B -> 217B 0.23067  
211B -> 217B 0.18798  
214B -> 217B -0.23431  
215B -> 217B 0.92013

Excited State 3: 2.105-A 2.6319 eV 471.08 nm f=0.0236 <S\*\*2>=0.858  
217A -> 219A -0.12184  
210B -> 217B -0.63512  
211B -> 217B 0.19498  
214B -> 217B 0.64515  
215B -> 217B 0.30129

#### Ph\*F<sub>2</sub>PyBTM (Optimized ground state structure, UB3LYP/6-31G(d, p))

Excitation energies and oscillator strengths:

Excited State 1: 2.054-A 2.2023 eV 562.96 nm f=0.0000 <S\*\*2>=0.805  
152B ->153B 0.99802

This state for optimization and/or second-order correction.

Total Energy, E(TD-HF/TD-DFT) = -3673.05979405

Copying the excited state density for this state as the 1-particle RhoCI density.

Excited State 2: 2.056-A 2.3466 eV 528.35 nm f=0.0000 <S\*\*2>=0.806  
151B ->153B 0.99686

Excited State 3: 2.129-A 2.6215 eV 472.95 nm f=0.0224 <S\*\*2>=0.884  
153A ->155A 0.13693  
146B ->153B 0.11981  
149B ->153B 0.74169  
150B ->153B -0.60083

#### Ph\*<sub>2</sub>F<sub>2</sub>PyBTM (Optimized ground state structure, UB3LYP/6-31G(d, p))

Excitation energies and oscillator strengths:

Excited State 1: 2.054-A 2.2869 eV 542.15 nm f=0.0000 <S\*\*2>=0.805  
184B ->185B 0.99745

This state for optimization and/or second-order correction.

Total Energy, E(TD-HF/TD-DFT) = -3641.11340266

Copying the excited state density for this state as the 1-particle RhoCI density.

Excited State 2: 2.054-A 2.2876 eV 541.99 nm f=0.0001 <S\*\*2>=0.805  
183B ->185B 0.99803

Excited State 3: 2.057-A 2.4292 eV 510.40 nm f=0.0000 <S\*\*2>=0.807  
182B ->185B 0.99524

#### Xyl<sub>2</sub>F<sub>2</sub>PyBTM (Optimized ground state structure, UB3LYP/6-31G(d, p))

Excitation energies and oscillator strengths:

Excited State 1: 2.115-A 2.3036 eV 538.23 nm f=0.1235 <S\*\*2>=0.868  
161A ->163A -0.12962  
153B ->161B -0.24800  
160B ->161B 0.93476

This state for optimization and/or second-order correction.

Total Energy, E(TD-HF/TD-DFT) = -3405.22248803

Copying the excited state density for this state as the 1-particle RhoCI density.

Excited State 2: 2.118-A 2.4007 eV 516.45 nm f=0.0427 <S\*\*2>=0.872  
161A ->162A -0.14612  
152B ->161B 0.24515  
156B ->161B -0.14156  
159B ->161B 0.92397

Excited State 3: 2.075-A 2.6819 eV 462.30 nm f=0.0044 <S\*\*2>=0.827  
156B ->161B 0.95112  
158B ->161B 0.21741  
159B ->161B 0.15354

**Biph<sub>2</sub>PyBTM (Optimized ground state structure, UB3LYP/6-31G(d, p))**

Excitation energies and oscillator strengths:

Excited State 1: 2.109-A 2.2703 eV 546.12 nm f=0.0941 <S\*\*2>=0.862  
185A ->186A -0.11569  
175B ->185B 0.14929  
182B ->185B 0.29659  
184B ->185B 0.91133

This state for optimization and/or second-order correction.

Total Energy, E(TD-HF/TD-DFT) = -3710.06567380

Copying the excited state density for this state as the 1-particle RhoCI density.

Excited State 2: 2.106-A 2.3585 eV 525.70 nm f=0.0297 <S\*\*2>=0.859  
185A ->187A -0.12599  
172B ->185B -0.15488  
181B ->185B 0.27994  
183B ->185B 0.91455

Excited State 3: 2.097-A 2.6274 eV 471.88 nm f=0.0038 <S\*\*2>=0.849  
176B ->185B -0.10199  
178B ->185B 0.41113  
180B ->185B 0.53158  
181B ->185B 0.48855  
182B ->185B 0.43330  
183B ->185B -0.16632  
184B ->185B -0.13913

### TippPyBTM (Optimized first doublet excited state structure, UB3LYP/6-31G(d))

Excitation energies and oscillator strengths:

```
Excited State 1: 2.069-A      1.8438 eV  672.42 nm  f=0.1000  <S**2>=0.820
 170B ->177B      -0.11147
 172B ->177B      -0.14699
 173B ->177B      -0.16310
 176B ->177B       0.95598
```

This state for optimization and/or second-order correction.

Total Energy, E(TD-HF/TD-DFT) = -4551.04394543

Copying the excited state density for this state as the 1-particle RhoCI density.

```
Excited State 2: 2.073-A      2.3646 eV  524.34 nm  f=0.0072  <S**2>=0.825
 171B ->177B      -0.15071
 173B ->177B      -0.21080
 174B ->177B       0.92400
 175B ->177B      -0.20069
```

```
Excited State 3: 2.060-A      2.3847 eV  519.93 nm  f=0.0010  <S**2>=0.810
 173B ->177B       0.16383
 174B ->177B       0.23704
 175B ->177B       0.95021
```

### Tipp<sub>2</sub>PyBTM (Optimized first doublet excited state structure, UB3LYP/6-31G(d))

Excitation energies and oscillator strengths:

```
Excited State 1: 2.075-A      1.8925 eV  655.13 nm  f=0.1031  <S**2>=0.826
 216B -> 225B      0.14726
 218B -> 225B      0.20947
 224B -> 225B      0.94907
```

This state for optimization and/or second-order correction.

Total Energy, E(TD-HF/TD-DFT) = -4676.36406924

Copying the excited state density for this state as the 1-particle RhoCI density.

```
Excited State 2: 2.059-A      2.3368 eV  530.57 nm  f=0.0034  <S**2>=0.810
 218B -> 225B      0.15391
 219B -> 225B      -0.29723
 220B -> 225B      0.28733
 222B -> 225B      -0.25071
 223B -> 225B      0.84713
```

```
Excited State 3: 2.064-A      2.3774 eV  521.51 nm  f=0.0078  <S**2>=0.815
 216B -> 225B      0.14643
 217B -> 225B      0.10504
 218B -> 225B      -0.28205
 220B -> 225B      -0.39645
 222B -> 225B      0.72473
 223B -> 225B      0.42262
```

### TippF<sub>2</sub>PyBTM (Optimized first doublet excited state structure, UB3LYP/6-31G(d))

Excitation energies and oscillator strengths:

```
Excited State 1: 2.075-A      1.9059 eV  650.52 nm  f=0.0957  <S**2>=0.827
 162B ->169B      -0.11062
 164B ->169B      0.19364
 168B ->169B      0.95953
```

This state for optimization and/or second-order correction.

Total Energy, E(TD-HF/TD-DFT) = -3830.32604321

Copying the excited state density for this state as the 1-particle RhoCI density.

```
Excited State 2: 2.072-A      2.4272 eV  510.80 nm  f=0.0108  <S**2>=0.823
 163B ->169B      0.14887
 166B ->169B      0.96854
```

```
Excited State 3: 2.058-A      2.4632 eV  503.34 nm  f=0.0004  <S**2>=0.809
 167B ->169B      0.99094
```

Tipp<sub>2</sub>F<sub>2</sub>PyBTM (Optimized first doublet excited state structure, UB3LYP/6-31G(d))

Excitation energies and oscillator strengths:

Excited State 1: 2.084-A 1.9595 eV 632.72 nm f=0.1002 <S\*\*2>=0.835  
217A -> 218A 0.10760  
208B -> 217B 0.14882  
210B -> 217B -0.16943  
216B -> 217B 0.95297

This state for optimization and/or second-order correction.

Total Energy, E(TD-HF/TD-DFT) = -3955.64602799

Copying the excited state density for this state as the 1-particle RhoCI density.

Excited State 2: 2.058-A 2.4177 eV 512.82 nm f=0.0018 <S\*\*2>=0.808  
210B -> 217B -0.13845  
211B -> 217B 0.31866  
212B -> 217B -0.23284  
214B -> 217B -0.18147  
215B -> 217B 0.88173

Excited State 3: 2.072-A 2.4642 eV 503.13 nm f=0.0136 <S\*\*2>=0.823  
208B -> 217B 0.10236  
209B -> 217B 0.15581  
210B -> 217B 0.11752  
211B -> 217B 0.17872  
212B -> 217B 0.77520  
214B -> 217B 0.46218  
215B -> 217B 0.27629

Ph\*F<sub>2</sub>PyBTM (Optimized first doublet excited state structure, UB3LYP/6-31G(d))

Excitation energies and oscillator strengths:

Excited State 1: 2.048-A 1.6246 eV 763.18 nm f=0.0000 <S\*\*2>=0.799  
152B ->153B 0.99892

This state for optimization and/or second-order correction.

Total Energy, E(TD-HF/TD-DFT) = -3673.07057295

Copying the excited state density for this state as the 1-particle RhoCI density.

Excited State 2: 2.050-A 2.2181 eV 558.95 nm f=0.0003 <S\*\*2>=0.800  
151B ->153B 0.99739

Excited State 3: 2.081-A 2.4013 eV 516.33 nm f=0.0063 <S\*\*2>=0.833  
147B ->153B 0.13692  
148B ->153B -0.26512  
149B ->153B -0.21497  
150B ->153B 0.90791

Ph\*<sub>2</sub>F<sub>2</sub>PyBTM (Optimized first doublet excited state structure, UB3LYP/6-31G(d))

Excitation energies and oscillator strengths:

Excited State 1: 2.049-A 1.7027 eV 728.18 nm f=0.0000 <S\*\*2>=0.799  
184B ->185B 0.99883

This state for optimization and/or second-order correction.

Total Energy, E(TD-HF/TD-DFT) = -3641.12435299

Copying the excited state density for this state as the 1-particle RhoCI density.

Excited State 2: 2.048-A 2.0600 eV 601.86 nm f=0.0000 <S\*\*2>=0.799  
183B ->185B 0.99811

Excited State 3: 2.050-A 2.2134 eV 560.16 nm f=0.0002 <S\*\*2>=0.801  
182B ->185B 0.99583

Xyl<sub>2</sub>F<sub>2</sub>PyBTM (Optimized first doublet excited state structure, UB3LYP/6-31G(d))

Excitation energies and oscillator strengths:

Excited State 1: 2.112-A 1.9050 eV 650.84 nm f=0.1372 <S\*\*2>=0.865  
161A ->162A 0.15043

153B ->161B 0.15865  
 160B ->161B 0.95544  
 This state for optimization and/or second-order correction.  
 Total Energy, E(TD-HF/TD-DFT) = -3405.22990239  
 Copying the excited state density for this state as the 1-particle RhoCI density.

Excited State 2: 2.101-A 2.2212 eV 558.18 nm f=0.0864 <S\*\*2>=0.853  
 161A ->163A 0.14709  
 152B ->161B 0.20617  
 155B ->161B -0.11667  
 159B ->161B 0.93101

Excited State 3: 2.080-A 2.5109 eV 493.78 nm f=0.0091 <S\*\*2>=0.831  
 154B ->161B 0.24704  
 155B ->161B 0.26875  
 156B ->161B 0.90174  
 157B ->161B -0.11643  
 158B ->161B 0.10932

**Biph<sub>2</sub>F<sub>2</sub>PyBTM (Optimized first doublet excited state structure, UB3LYP/6-31G(d))**

Excitation energies and oscillator strengths:

Excited State 1: 2.100-A 1.8147 eV 683.22 nm f=0.0895 <S\*\*2>=0.853  
 185A ->186A 0.12262  
 182B ->185B 0.19439  
 184B ->185B 0.95374

This state for optimization and/or second-order correction.  
 Total Energy, E(TD-HF/TD-DFT) = -3710.07389682  
 Copying the excited state density for this state as the 1-particle RhoCI density.

Excited State 2: 2.085-A 2.1640 eV 572.95 nm f=0.0674 <S\*\*2>=0.837  
 185A ->187A -0.11043  
 173B ->185B -0.10488  
 181B ->185B 0.25849  
 183B ->185B 0.92645

Excited State 3: 2.085-A 2.4548 eV 505.06 nm f=0.0037 <S\*\*2>=0.836  
 173B ->185B -0.11584  
 176B ->185B 0.12897  
 178B ->185B 0.40200  
 179B ->185B 0.55797  
 180B ->185B 0.20058  
 181B ->185B 0.61296  
 182B ->185B 0.10235  
 183B ->185B -0.16573

<sup>1</sup>H NMR (400 MHz, CDCl<sub>3</sub>) spectrum of αH-TippPyBTM (1H)

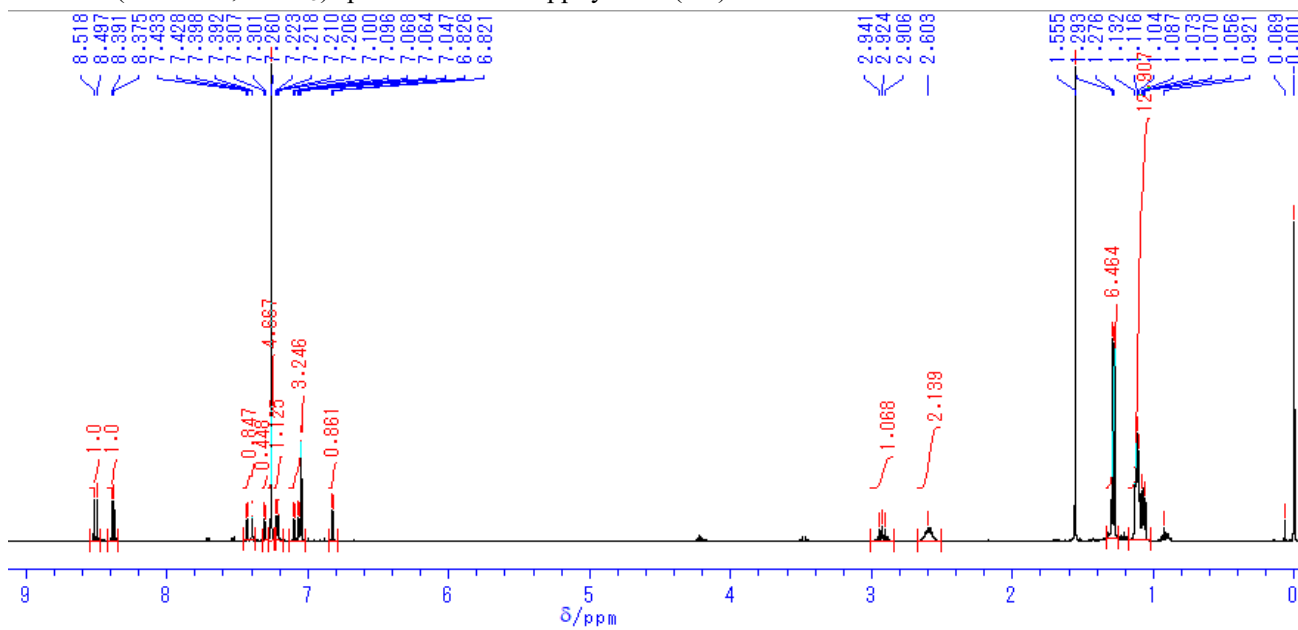

<sup>13</sup>C NMR (100 MHz, CDCl<sub>3</sub>) spectrum of αH-TippPyBTM (1H)

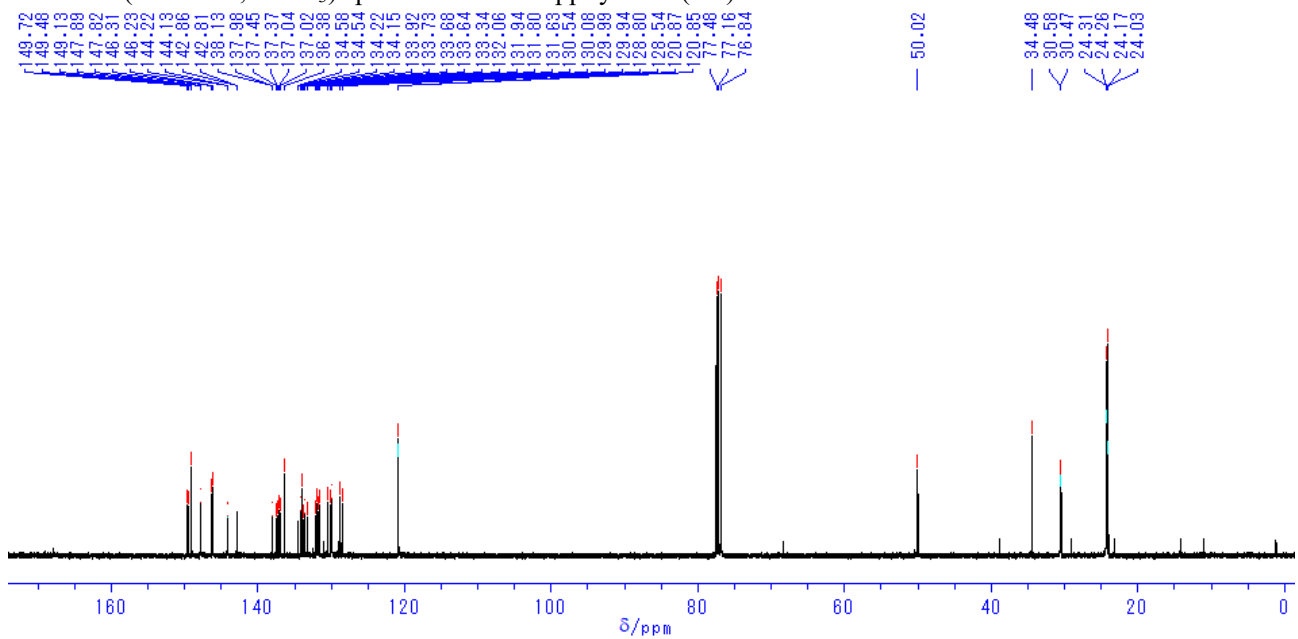

$^1\text{H}$  NMR (400 MHz,  $\text{CDCl}_3$ ) spectrum of  $\alpha\text{H-TippPyBTM}$  (**2H**)

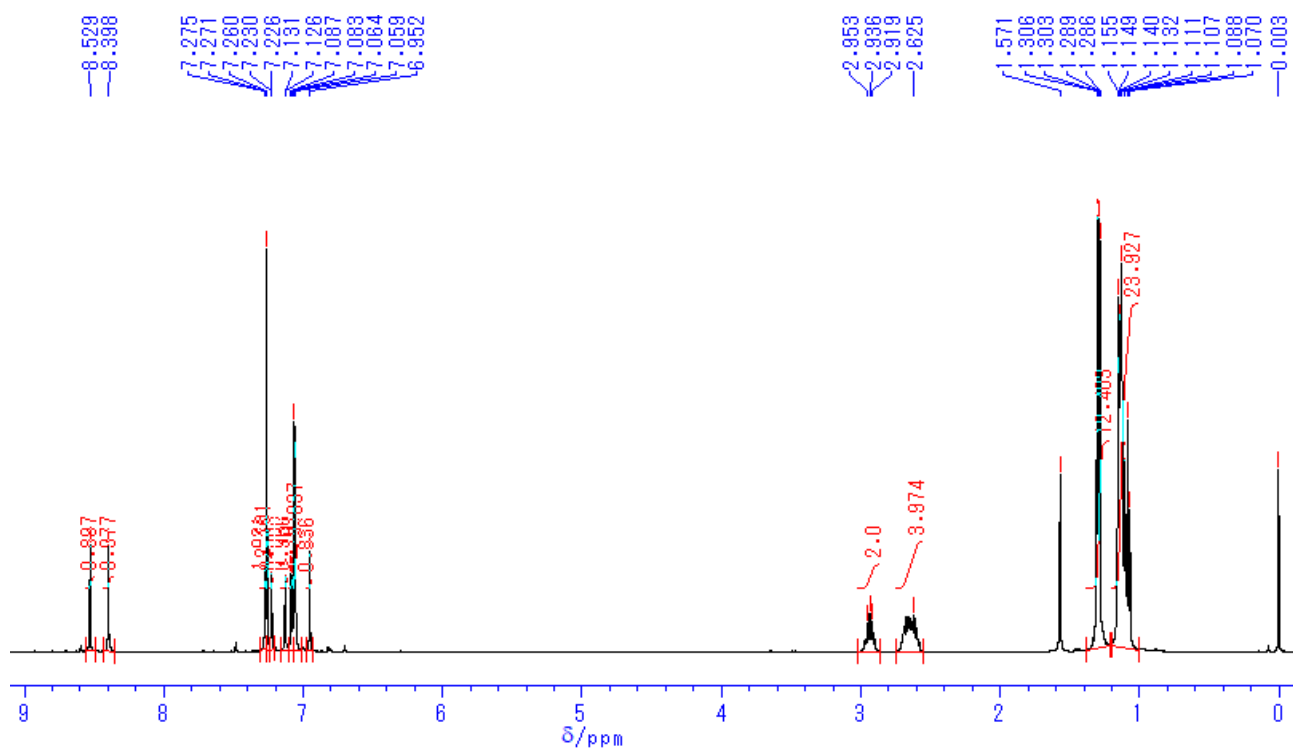

$^{13}\text{C}$  NMR (100 MHz,  $\text{CDCl}_3$ ) spectrum of  $\alpha\text{H-Tipp}_2\text{PyBTM}$  (**2H**)

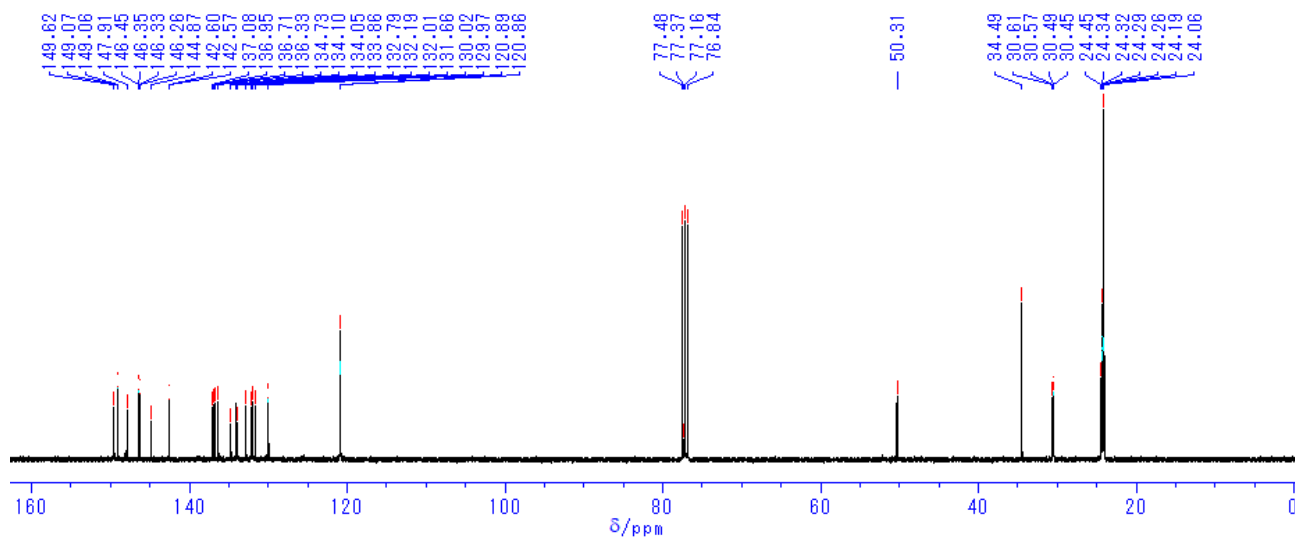

$^1\text{H}$  NMR (400 MHz,  $\text{CDCl}_3$ ) spectrum of  $\alpha\text{H-TippF}_2\text{PyBTM}$  (**3H**)

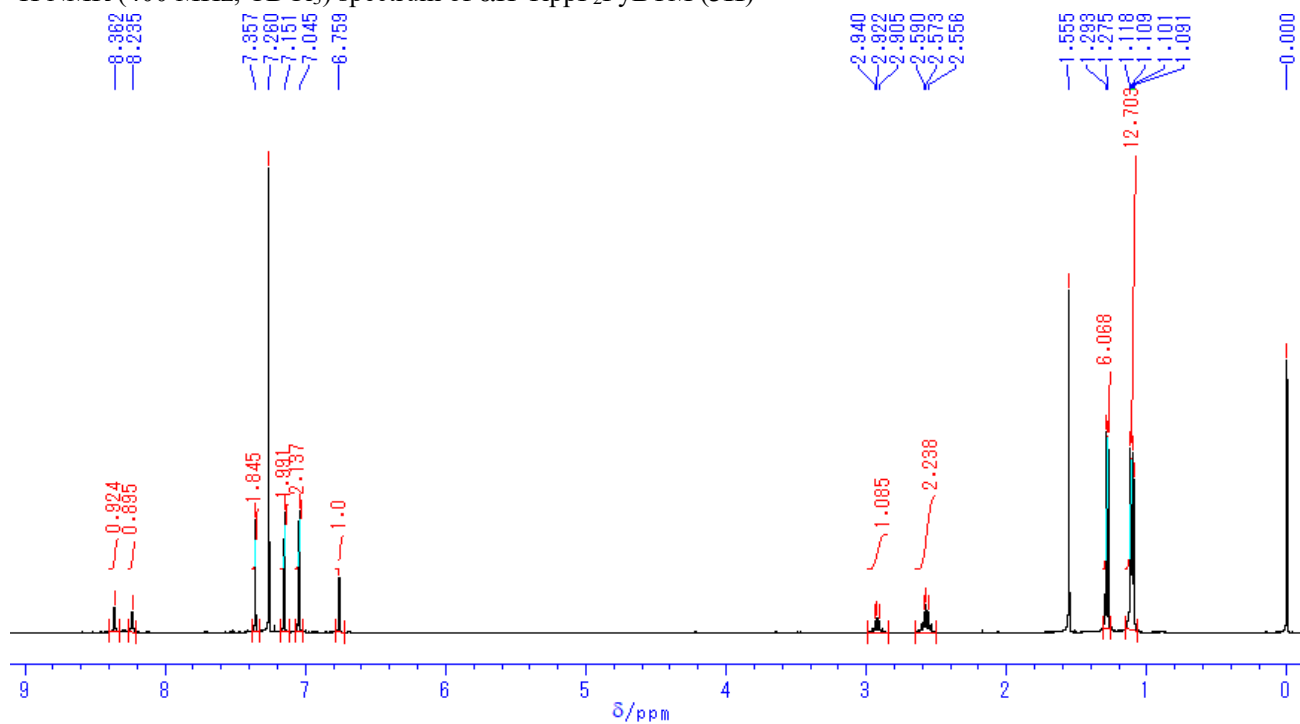

$^{13}\text{C}$  NMR (100 MHz,  $\text{CDCl}_3$ ) spectrum of  $\alpha\text{H-TippF}_2\text{PyBTM}$  (**3H**)

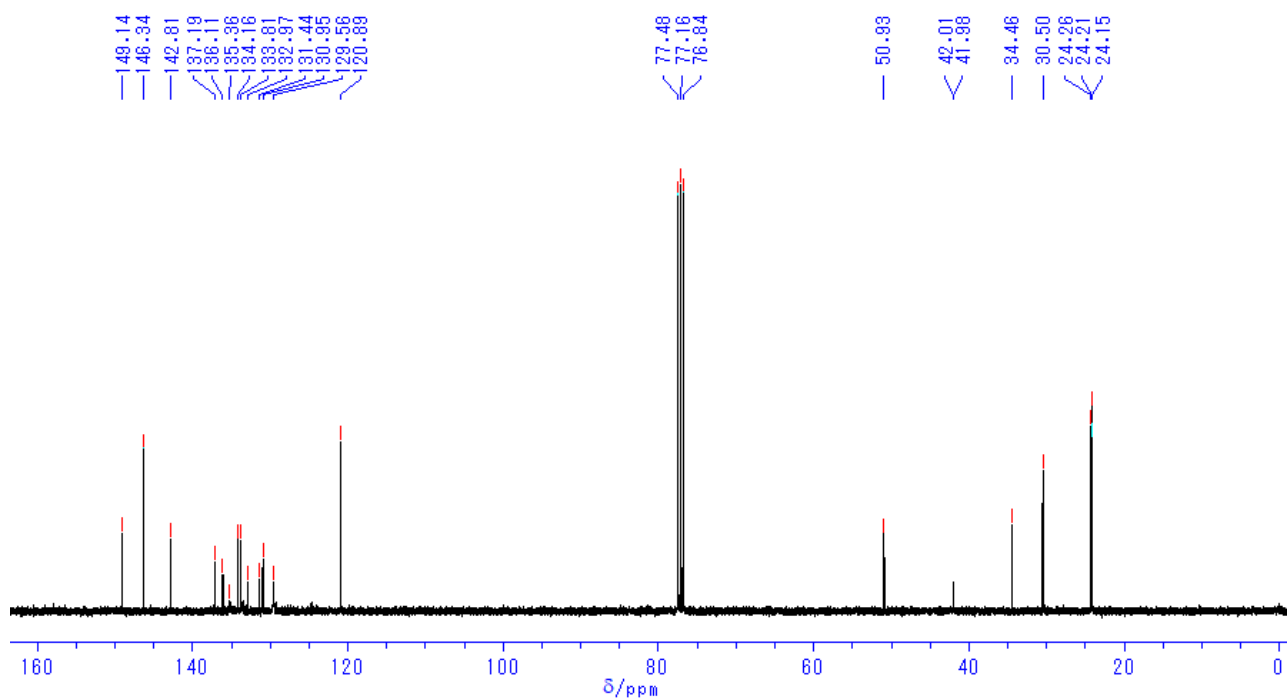



$^1\text{H}$  NMR (400 MHz,  $\text{CDCl}_3$ ) spectrum of  $\alpha\text{H-Tipp}_2\text{F}_2\text{PyBTM}$  (**4H**)

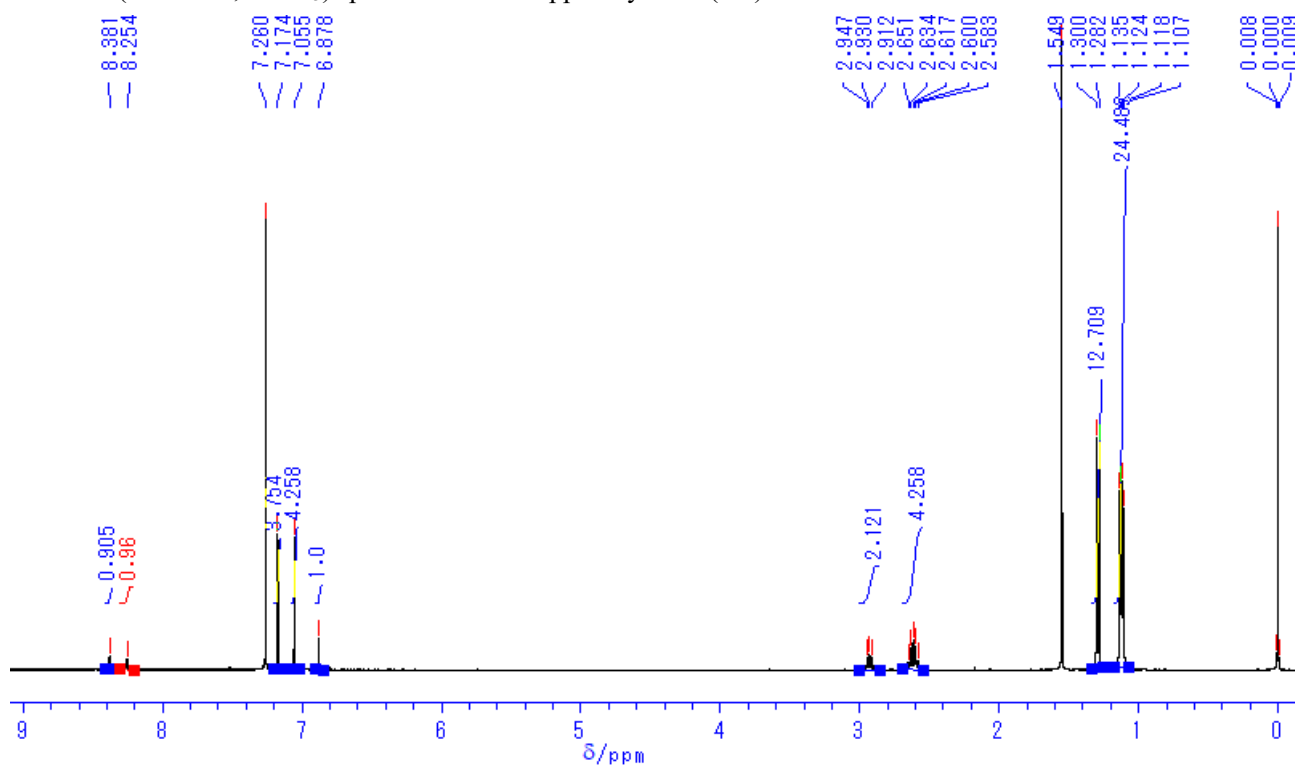

$^{13}\text{C}$  NMR (100 MHz,  $\text{CDCl}_3$ ) spectrum of  $\alpha\text{H-Tipp}_2\text{F}_2\text{PyBTM}$  (**4H**)

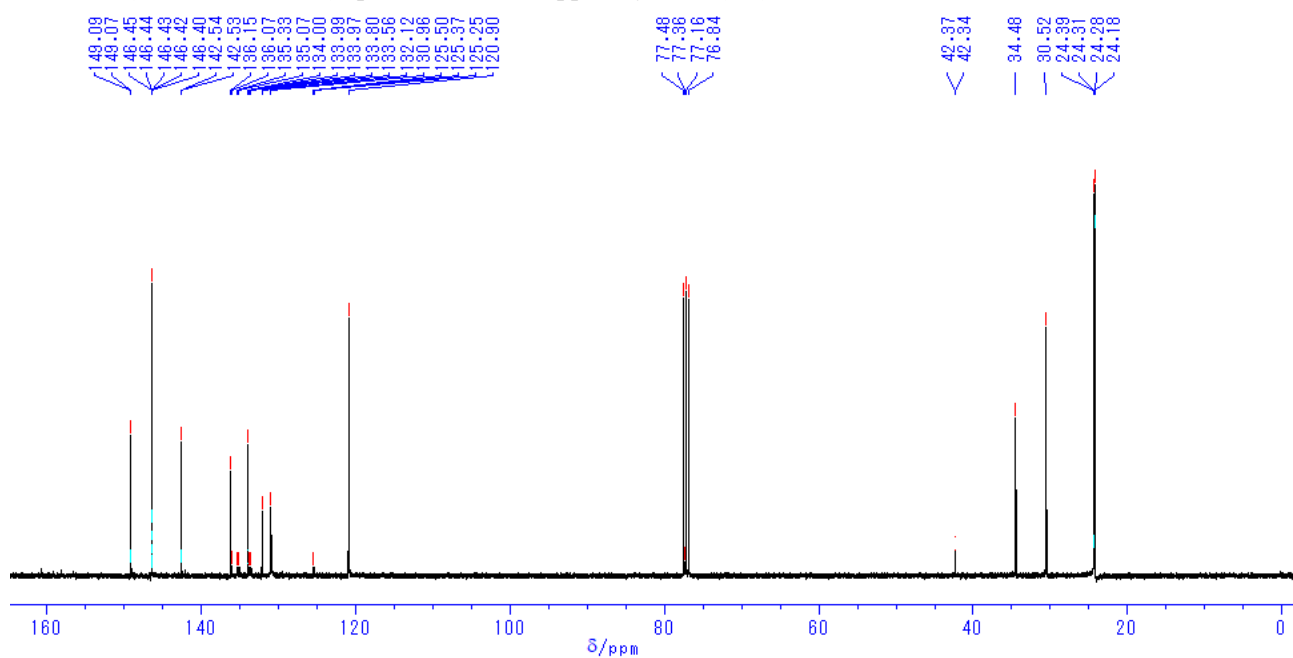



$^1\text{H}$  NMR (400 MHz,  $\text{CDCl}_3$ ) spectrum of  $\alpha\text{H-Ph}^*\text{F}_2\text{PyBTM}$  (**6H**)

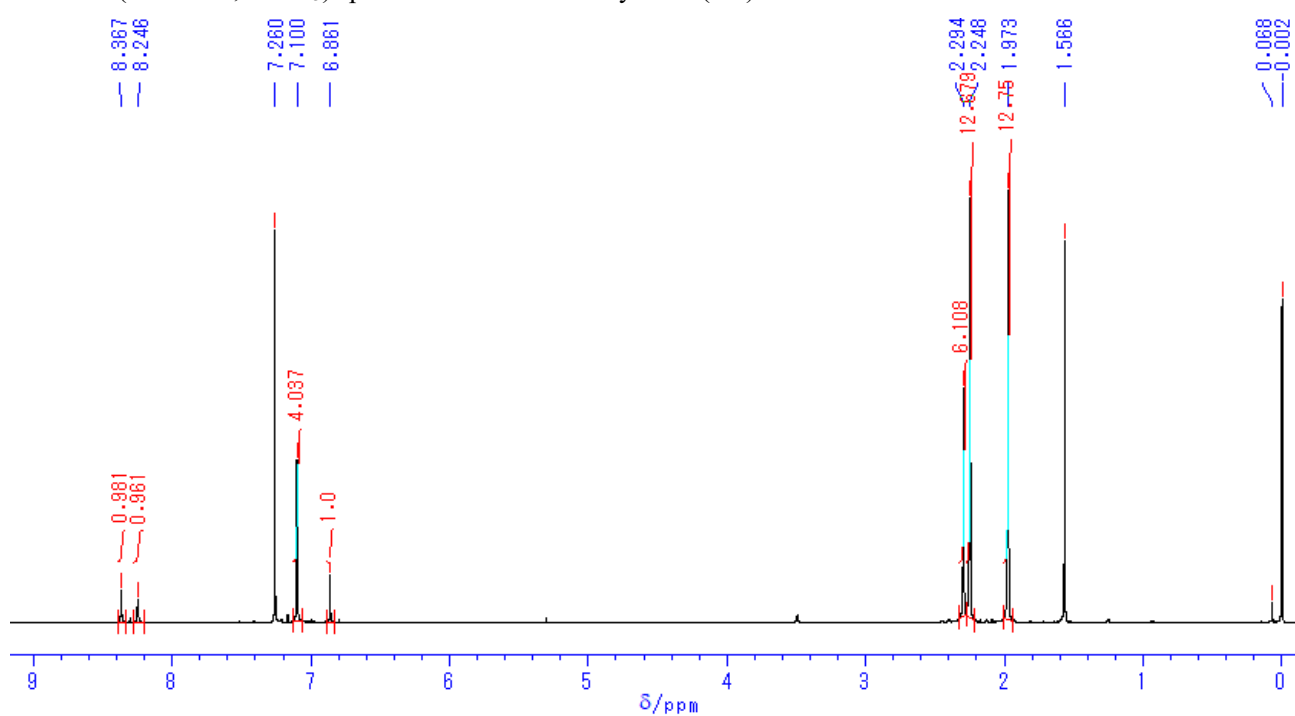

$^{13}\text{C}$  NMR (100 MHz,  $\text{CDCl}_3$ ) spectrum of  $\alpha\text{H-Ph}^*\text{F}_2\text{PyBTM}$  (**6H**)

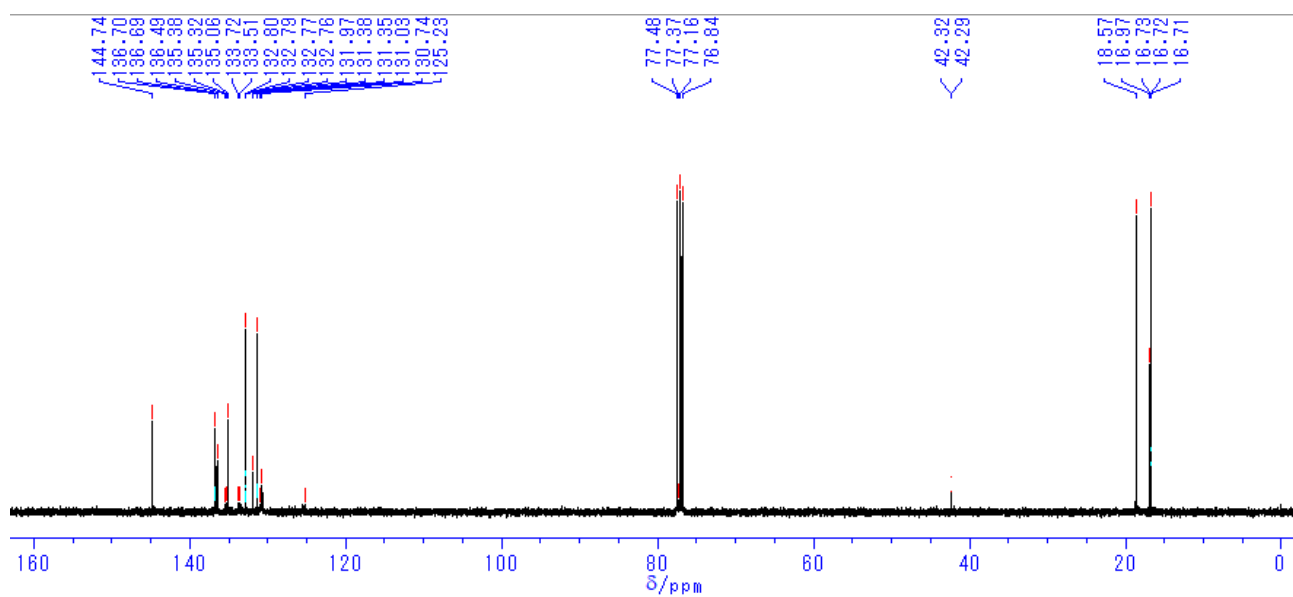

$^1\text{H}$  NMR (400 MHz,  $\text{CDCl}_3$ ) spectrum of  $\alpha\text{H-Xyl}_2\text{F}_2\text{PyBTM}$  (**7H**)

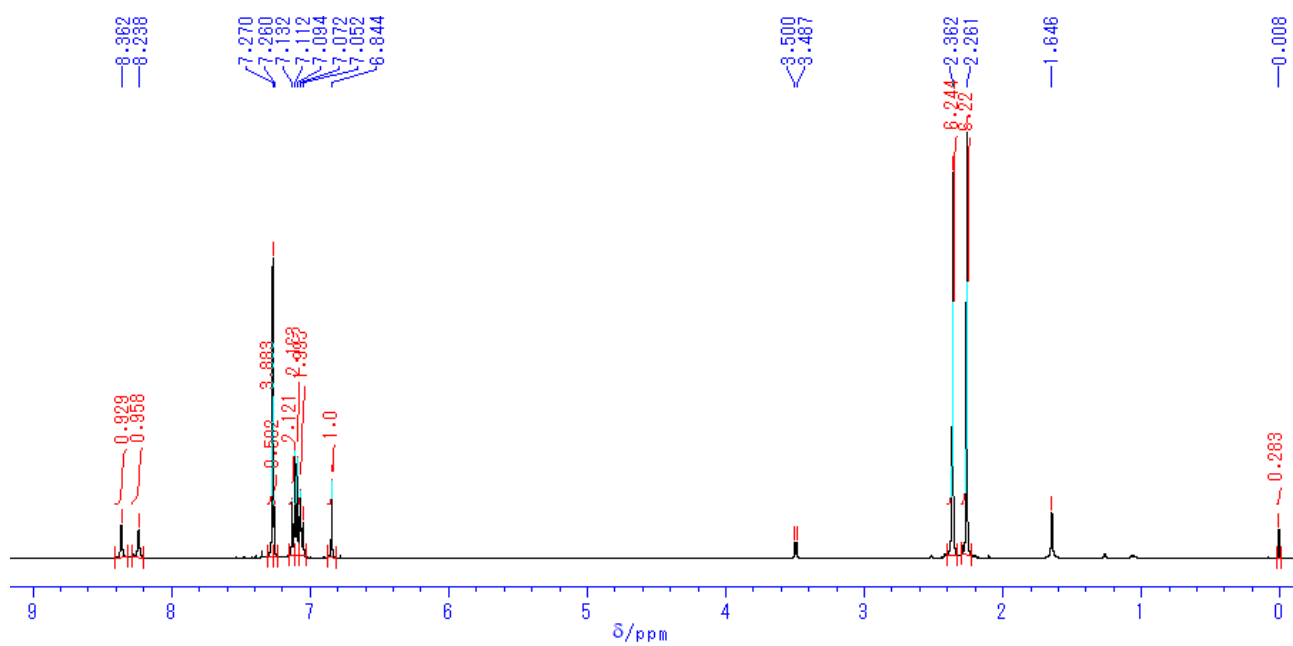

$^{13}\text{C}$  NMR (100 MHz,  $\text{CDCl}_3$ ) spectrum of  $\alpha\text{H-Xyl}_2\text{F}_2\text{PyBTM}$  (**7H**)

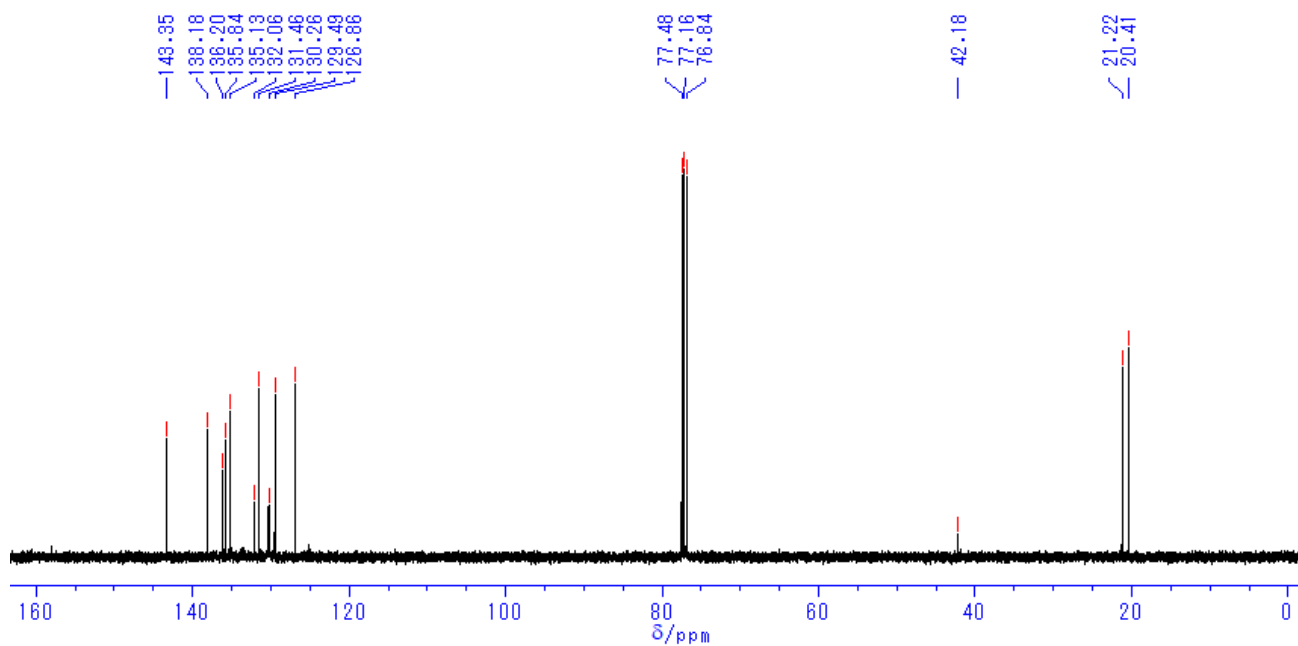

$^1\text{H}$  NMR (400 MHz,  $\text{CDCl}_3$ ) spectrum of  $\alpha\text{H-Biph}_2\text{F}_2\text{PyBTM}$  (**8H**)

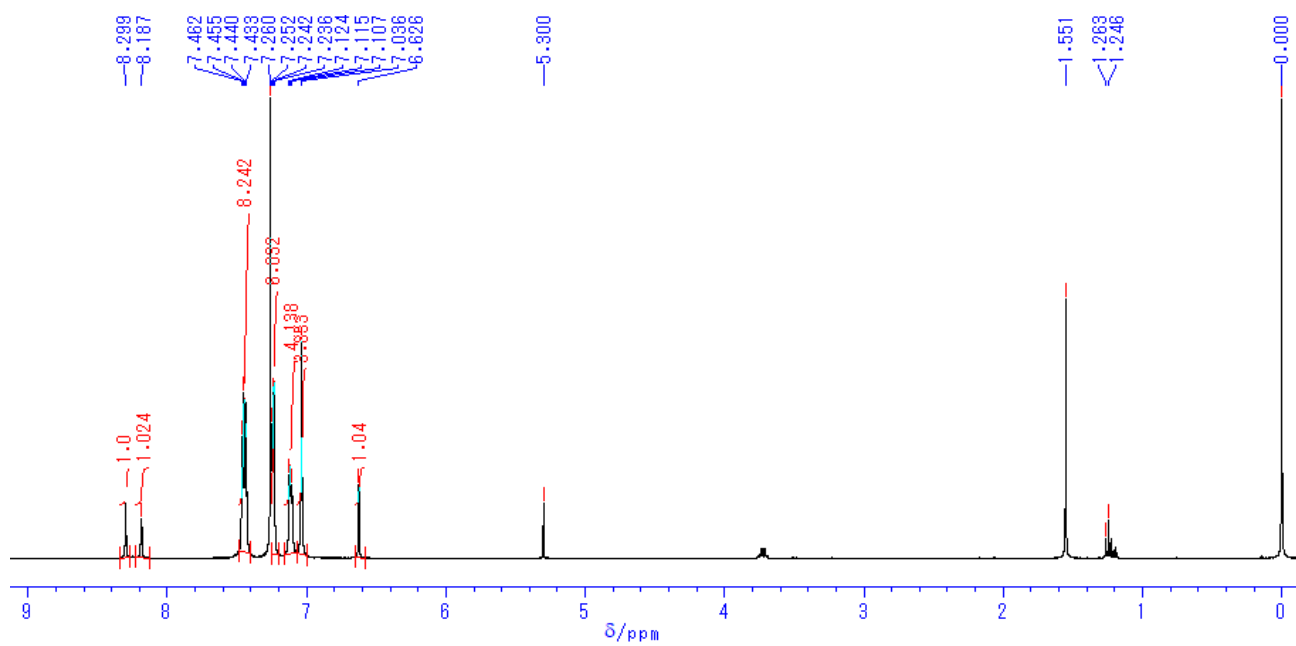

$^{13}\text{C}$  NMR (100 MHz,  $\text{CDCl}_3$ ) spectrum of  $\alpha\text{H-Biph}_2\text{F}_2\text{PyBTM}$  (**8H**)

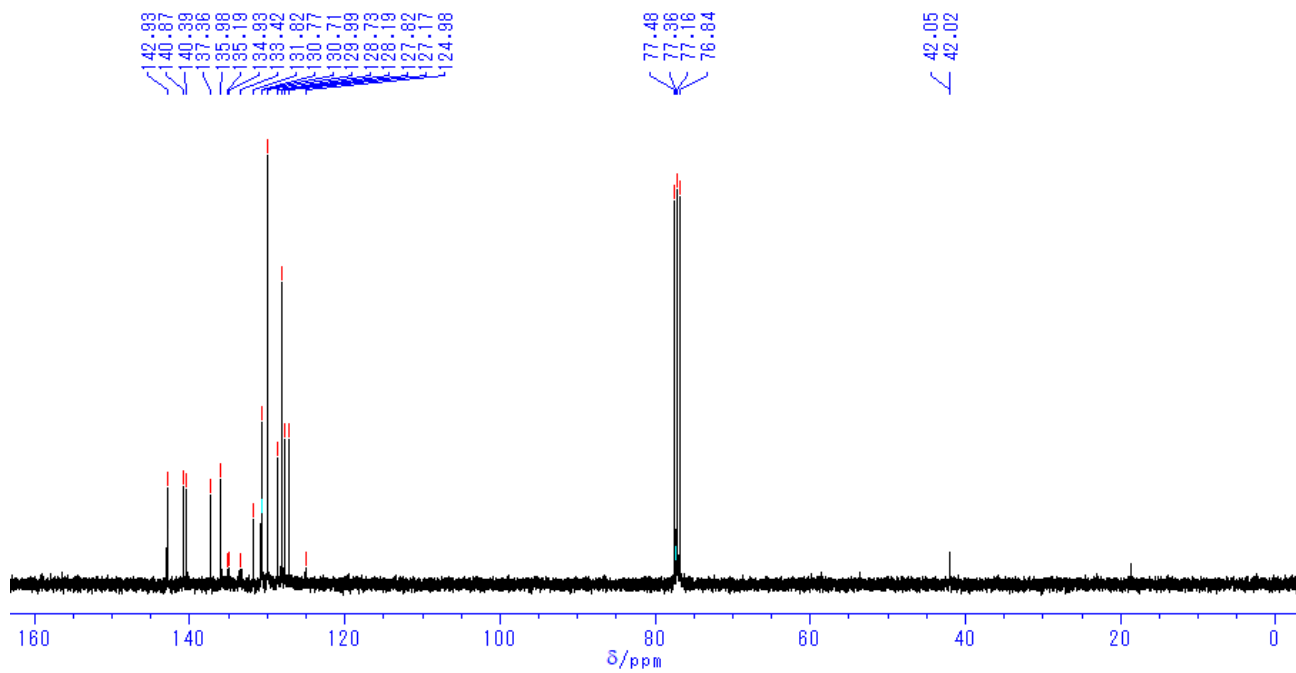

Supplement: d3ma00469d1.pdf [file d3ma00469d1.pdf]
